# Supplementary material for: Lumbar spine surgery across 15 years: trends, complications and reoperations in a longitudinal observational study from Norway
Source: PubMed Central journal article supplement — BMJ Open. 2019 Aug 1;9(8):e028743. doi: 10.1136/bmjopen-2018-028743 (PMC6688683; doi:10.1136/bmjopen-2018-028743), 2019-08-01
Supplement: bmjopen-2018-028743.draft_revisions.pdf [file bmjopen-2018-028743.draft_revisions.pdf]

# BMJ Open

BMJ Open is committed to open peer review. As part of this commitment we make the peer review history of every article we publish publicly available.

When an article is published we post the peer reviewers' comments and the authors' responses online. We also post the versions of the paper that were used during peer review. These are the versions that the peer review comments apply to.

The versions of the paper that follow are the versions that were submitted during the peer review process. They are not the versions of record or the final published versions. They should not be cited or distributed as the published version of this manuscript.

BMJ Open is an open access journal and the full, final, typeset and author-corrected version of record of the manuscript is available on our site with no access controls, subscription charges or pay-per-view fees (<http://bmjopen.bmj.com>).

If you have any questions on BMJ Open's open peer review process please email [info.bmjopen@bmj.com](mailto:info.bmjopen@bmj.com)

# BMJ Open

## Lumbar spine surgery across 15-years: trends, complications and reoperations in a time-series study

|                               |                                                                                                                                                                                                                                                                                                                                                                                                                                                                                                                                                                                                                                                                                                                                                                                                                                                                                                                                         |
|-------------------------------|-----------------------------------------------------------------------------------------------------------------------------------------------------------------------------------------------------------------------------------------------------------------------------------------------------------------------------------------------------------------------------------------------------------------------------------------------------------------------------------------------------------------------------------------------------------------------------------------------------------------------------------------------------------------------------------------------------------------------------------------------------------------------------------------------------------------------------------------------------------------------------------------------------------------------------------------|
| Journal:                      | <i>BMJ Open</i>                                                                                                                                                                                                                                                                                                                                                                                                                                                                                                                                                                                                                                                                                                                                                                                                                                                                                                                         |
| Manuscript ID                 | bmjopen-2018-028743                                                                                                                                                                                                                                                                                                                                                                                                                                                                                                                                                                                                                                                                                                                                                                                                                                                                                                                     |
| Article Type:                 | Research                                                                                                                                                                                                                                                                                                                                                                                                                                                                                                                                                                                                                                                                                                                                                                                                                                                                                                                                |
| Date Submitted by the Author: | 01-Jan-2019                                                                                                                                                                                                                                                                                                                                                                                                                                                                                                                                                                                                                                                                                                                                                                                                                                                                                                                             |
| Complete List of Authors:     | Grotle, Margreth; Hogskolen i Oslo og Akershus, Department of Physiotherapy; Oslo universitetssykehus Ulleval, Research and Communication Unit for Musculoskeletal Health<br>Småstuen, Milada; Oslo Metropolitan University, Department of Nursing and Health Promotion<br>Fjeld, Olaf; Oslo universitetssykehus Ulleval, Research and Communication Unit for Musculoskeletal Disorders<br>Grøvle, Lars; Sykehuset Ostfold HF,<br>Helgeland, Jon; Nasjonalt folkehelseinstitutt, Division of Health Services<br>Storheim, Kjersti; Research and Communication Unit for Musculoskeletal Health (FORMI); Faculty of Health Sciences, Oslo Metropolitan University<br>Solberg, Tore; University Hospital of North Norway, Neurosurgery; North Norway Health Authority, The Norwegian Registry for Spine Surgery<br>Zwart, John-Anker; Oslo University Hospital, Department of Neurology and FORMI; University of Oslo, Faculty of Medicine |
| Keywords:                     | Neurosurgery < SURGERY, Orthopaedic & trauma surgery < SURGERY, EPIDEMIOLOGY                                                                                                                                                                                                                                                                                                                                                                                                                                                                                                                                                                                                                                                                                                                                                                                                                                                            |
|                               |                                                                                                                                                                                                                                                                                                                                                                                                                                                                                                                                                                                                                                                                                                                                                                                                                                                                                                                                         |

SCHOLARONE™  
Manuscripts

## Lumbar spine surgery across 15-years:

### trends, complications and reoperations in a time-series study

Margreth Grotle, PhD<sup>1,2</sup>, Milada Cvancarova Småstuen, PhD<sup>1,2</sup>, Olaf Fjeld, MD<sup>1,3,4</sup>, Lars Grøvle, MD, PhD<sup>5</sup>, Jon Helgeland, MSc<sup>6</sup>, Kjersti Storheim, PhD<sup>1,2</sup>, Tore Kristian Solberg, MD, PhD<sup>7,8,9</sup>, John-Anker Zwart, MD, PhD<sup>4,10</sup>

#### **ABSTRACT**

Studies from different Western countries have reported a rapid increase in spinal surgery rates, an increase that exceeds by far the growing incidence rates of spinal disorders in the general population. There are few studies covering all lumbar spine surgery and no previous studies from Norway.

#### **Objectives**

The purpose of this study was to investigate trends in all lumbar spine surgery in Norway over 15 years, including length of hospital stay, and rates of complications and reoperations.

#### **Design**

A time-series study over 15 year using hospital patient administrative data and sociodemographic data from the National Registry in Norway.

#### **Setting and participants**

Patients aged  $\geq 18$  years discharged from Norwegian public hospitals between 1999 and 2013.

#### **Outcome measures**

Annual rates of simple (microsurgical discectomy, decompression) and complex surgical procedures (fusion, disc prosthesis) in the lumbar spine.

#### **Results**

The rate of lumbar spine surgery increased by 54%, from 78 (95%CI [75-80]) to 120 [107-113] per 100,000, from 1999 to 2013. More men had simple surgery whereas more women had complex surgery. Among elderly people over 75 years, lumbar surgery increased by a factor of five during the 15-year period. The rates of complications were low, but increased from 0.7% in 1999 to 2.4% in 2013.

## 1 **Conclusions**

2 There was a substantial increase in lumbar spine surgery in Norway from 1999 to 2013,  
3 similar to trends in other Western world countries. The rise in lumbar surgery among elderly  
4 people represents a significant workload and challenge for health services, given our aging  
5 population.

## 6 **Key Words**

7 neurosurgery, orthopaedic & trauma surgery, epidemiology

## 8 **Strengths and limitations of this study**

- 9 1. From 1999 to 2013 the annual rates of all lumbar spine surgery, including both simple  
10 procedures like microdiscectomy and decompression and complex procedures like  
11 fusion and disc prosthesis, in Norwegian public hospitals more than doubled.
- 12 2. The median length of hospital stay decreased from 7 days in 1999 to 4 days in 2013,  
13 but patients who received complex surgery the median length of stay was nearly  
14 double that of those who underwent a simple procedure (8 versus 4 days).
- 15 3. More men underwent simple surgical procedures, whereas more women underwent  
16 complex surgical procedures over the 15 years.
- 17 4. Most surgeries were performed on patients aged 40–59, but a substantial shift  
18 towards operations performed on the older age groups was apparent for both simple  
19 and complex surgery.
- 20 5. The complication rates were low, and were significantly associated with younger and  
21 middle-aged groups, receiving complex surgery, and having an extended hospital  
22 stay.

## 23 **INTRODUCTION**

24 Low back pain is the leading cause of years lost to disability worldwide, and this burden is  
25 increasing as our population ages [1]. Low back pain was responsible for 60.1 million  
26 disability-adjusted life years in 2015, an increase of 54% since 1990, with the largest increase  
27 seen in low- and middle-income countries [1]. The economic burden is extensive, mostly due  
28 to sickness absence costs, but also due to the high cost of diagnostic tests and, in particular,  
29 spinal surgery [1]. The use of spinal surgery has increased considerably in many Western  
30

1  
2  
3 1 countries over the past 20 years [2-11]. This increase cannot be explained by higher  
4  
5 2 incidence or prevalence rates of spinal disorders [2-7], and there are marked variations in  
6  
7 3 spinal surgery rates between and within countries [7, 11].

8  
9 4 National administrative databases provide important information regarding health  
10  
11 5 services, which is crucial for planning and allocating healthcare resources. Many previous  
12  
13 6 studies on the rates of all types of lumbar surgery come from the USA [2, 4, 7, 9]. There are  
14  
15 7 also studies from Germany [6], United Kingdom [10], Sweden [3], and Denmark [5], but none  
16  
17 8 from Norway. Moreover, none of the published studies provide an overview of *all* types of  
18  
19 9 spinal surgery including simple surgical procedures such as microsurgical discectomy and/or  
20  
21 10 decompression, and complex surgical procedures like fusions and disc prosthesis. An  
22  
23 11 overview of all spinal surgery, including complication and reoperation rates, will provide  
24  
25 12 important information for the evaluation of current public health services, as well as the  
26  
27 13 planning of future services.

28  
29 14 Hence, the primary aim of this study was to investigate the longitudinal trends in  
30  
31 15 hospital discharges of *all* surgical procedures for lumbar spine disorders in Norway from  
32  
33 16 1999 to the end of 2013. Further, length of hospital stay, and rates of complications and  
34  
35 17 reoperations over the 15-year period were investigated.

## 36 37 19 **MATERIAL AND METHODS**

### 38 39 20 ***Design***

40  
41  
42 21 This was a retrospective observational study comprising all discharges from Norwegian  
43  
44 22 public hospitals over a 15-year period (1999–2013). Norway (population of 4.46 million in  
45  
46 23 1999 and 5.05 million in 2013) [12] has a national healthcare system divided into four health  
47  
48 24 regions (South-East, West, Middle, and North). Private surgery, primarily day surgery,  
49  
50 25 became available after 2007. It is estimated that currently approximately 7% of all elective  
51  
52 26 spinal surgeries take place in the private sector [13].

### 53 54 27 ***Data source***

55  
56  
57 28 Hospital patient administrative data were retrieved from a national database located at the  
58  
59 29 Norwegian Knowledge Centre for the Health Services. The database was initially established  
60

1  
2  
3 1 as a part of the project “*Post-hospitalization survival rates in Norway as indicators of hospital*  
4 2 *quality*”. A detailed description of the methods employed in data collection is published  
5 3 elsewhere [14]. Patient administrative data for the period 1999–2009 were extracted  
6 4 directly from all Norwegian public hospitals, and, for the period 2010–2013, from the  
7 5 Norwegian Patient Registry (NPR). Norwegian hospitals were mandated to submit data to  
8 6 the NPR since 2010. Each hospitalization record contains a personal identifier, codes for  
9 7 diagnoses, medical procedures, and date and time of admission and discharge. Data from  
10 8 the National Registry provided by Statistics Norway made it possible to link the NPR data to  
11 9 patients’ age, sex, and municipality of residence. Each entry in the database represents a  
12 10 single hospitalization record including diagnoses based on ICD-10 and surgical procedure  
13 11 codes based on the NOMESCO Classification of Surgical Procedures (NCSP) [15].

### 12 ***Patient and Public Involvement***

13 13 Due to the use of administrative data in this study patients or public were not involved in  
14 14 this project.

### 16 ***Selection of sample and classification of outcome***

17 17 Inclusion criteria were: age  $\geq 18$  years and a lumbar spine diagnosis code (ICD-codes from  
18 18 M40 to M54). Exclusion criteria were: diagnoses related to the cervical, thoracic, or an  
19 19 unspecified region of the spine, as well as diagnoses indicating cancer, trauma, spinal  
20 20 fractures, pregnancy, spinal infections, and inflammatory diseases.

21 21 For identifying discharges with *simple* surgical procedures defined as discectomy  
22 22 and/or decompression, the following NCSP ABC codes were used [15]: ABC07, ABC16,  
23 23 ABC26, ABC28, ABC36, ABC40, ABC56, ABC66, and ABC99. The *complex* surgical procedures  
24 24 included procedure codes for fusion surgery (NAG and NAN), disc prosthesis (NAB and NAC),  
25 25 and revision surgery (NAT and NAU) [15]. Further, NAE, NAF, NAH, NAM, NAT, and NAU  
26 26 procedure codes were included if coexisting with NCSP codes indicating a complex  
27 27 procedure. This is similar to the classification used in the Norwegian Registry for Spine  
28 28 Surgery (NORspine) [16]. A list of all included procedure codes can be delivered by  
29 29 contacting the corresponding author.

1  
2  
3 1        *Complications* were identified by the following ICD-10 codes occurring within 30 days  
4  
5 2 after a discharge: postoperative hematoma (T81.0), post-procedural shock (T81.1),  
6  
7 3 unintentional puncture/laceration (T81.2), disruption of wound/wound dehiscence (T81.3),  
8  
9 4 infection following a procedure (T81.4), foreign body accidentally left in body following  
10  
11 5 procedure (T81.5), acute reaction to foreign body accidentally left during a procedure  
12  
13 6 (T81.6), vascular complications following a procedure (T81.7), unspecified or other  
14  
15 7 complications of procedure, either upon initial surgical admission or upon readmission  
16  
17 8 (T81.8-9), and complications during anesthesia (T88.4-5). NAW (reoperation) and AW  
18  
19 9 (reoperations of the nervous system) procedure codes that occurred within 30 days after the  
20  
21 10 initial surgery were also classified as *complications*. NAW and AW procedure codes occurring  
22  
23 11 later than 30 days after an initial procedure were classified as *reoperations*.

## 24 12 **Background characteristics**

25  
26  
27 13 Patient age, gender, length of hospital stay, and number of operations were included. Age  
28  
29 14 was categorized as 18–39 years, 40–59 years, 60–75 years, or >75 years.

## 30 15 **Statistical analyses**

31  
32  
33  
34  
35 16 Annual surgical incidence rates were calculated per 100,000 inhabitants based on the size of  
36  
37 17 the total Norwegian population on Jan 1<sup>st</sup> of each analyzed year, retrieved from Statistics  
38  
39 18 Norway [12]. Surgical incidence rates across age groups, gender, and type of surgery  
40  
41 19 (simple/complex) were compared with  $\chi^2$ - and z-tests. Length of hospital stay over the time  
42  
43 20 period and in relation to background characteristics was compared using a non-parametric  
44  
45 21 Kruskal-Wallis test. Possible associations between complications and background  
46  
47 22 characteristics were analyzed using a multivariate logistic regression. All tests were two-  
48  
49 23 sided and p-values <0.05 were considered statistically significant. Data analyses were  
50  
51 24 performed using SPSS version 25.0 (IBM, Armonk, NY, USA) and STATA version MP15.

52  
53 25

## 54 26 **RESULTS**

55  
56  
57 27 A total of 67,855 discharges for 57,081 individual patients were identified. A total of 56,764  
58  
59 28 (83.7%) discharges were for simple surgical procedures and 11,091 (16.3%) discharges were

1  
2  
3 1 for complex surgical procedures. Most of the complex surgical procedures were fusion  
4  
5 2 surgeries (94%). Further, 48,495 individual patients (71.5%) had only one discharge due to  
6  
7 3 spinal surgery. The mean age of the patients was 52.3 (SD 15.9), and 51.4% were men.

8  
9 4 Background characteristics of all included discharges are presented in Table 1.

10  
11 5 The median length of hospital stay for all patients undergoing spinal surgery  
12  
13 6 decreased from 7.1 [IQR 6.0] days in 1999 to 3.8 [IQR 4.1] in 2013 (Table 1). For those  
14  
15 7 undergoing a complex procedure the median length was nearly double that of those who  
16  
17 8 underwent a simple procedure [8.2 (IQR) days versus 4.3 (IQR)]. In the simple surgery group,  
18  
19 9 the length of hospital stay was reduced from a median of 6.2 [IQR 5.0] days in 1999 to 3.1  
20  
21 10 [IQR 3.1] in 2013, and in the complex surgery group there was a reduction from a median of  
22  
23 11 11.0 [IQR 6.1] in 1999 to 7.0 [IQR 4.0] in 2013.

24  
25  
26 12 **Insert Table 1 here**

27  
28 13 The annual surgical rate including both simple and complex procedures increased  
29  
30 14 from 77.8 (95%CI [75.2-80.4]) per 100,000 in 1999 to 119.9 (95%CI [107.0-112.8] in 2013  
31  
32 15 (Fig1). The rate of simple procedures increased by 138% (from 64.3 to 88.9 per 100,000  
33  
34 16 inhabitants for 1999 and 2013, respectively), and the rate of complex procedures increased  
35  
36 17 by 154% (from 13.6 to 21.0 per 100,000). During the 15-year study period, significantly more  
37  
38 18 males underwent simple surgical procedures, whereas more females underwent complex  
39  
40 19 surgical procedures (Fig2).

41  
42  
43 20 **Insert Fig1 and Fig2 here**

44  
45 21 Most surgeries were performed on patients aged 40–59 (Fig3). A substantial shift  
46  
47 22 towards operations performed on the older age groups is apparent for both simple and  
48  
49 23 complex surgery. Among those aged 75 years and above, the rate of simple surgery  
50  
51 24 increased by more than a factor of five by 2013, reaching 167.8 [154.3-181.3]. A similar shift  
52  
53 25 was also apparent for the complex procedures. In 1999 only 7.8 [30.3-42.9] operated  
54  
55 26 patients per 100,000 inhabitants were in the oldest age group, whereas in 2013 this rate had  
56  
57 27 increased to 36.6 [30.3-42.9]. In the younger age groups, the complex surgery rate remained  
58  
59 28 stable over the 15-year period.

60  
29 **Insert Fig3 here**



1  
2  
3 1 The occurrence of complications was generally low. During the 15-year period a total  
4 of 977 (1.4%, 95% [CI 1.38 – 1.56]) discharges were coded with diagnoses or procedures  
5 2  
6 3 indicating complications. Of these, 42% occurred during the index stay and 68% underwent  
7 4  
8 5 reoperation within 30 days. Over the 15-year period, the complication rate more than  
9 6  
10 7 tripled, from 0.7% in 1999 to 2.4% in 2013. The multivariate analysis showed that  
11 8  
12 9 complications were significantly associated with younger and middle-aged groups, receiving  
13 10  
14 11 complex surgery, and having an extended hospital stay (Table 2). There was no statistically  
15 12  
16 13 significant interaction between type of surgery (simple vs complex) and length of hospital  
17 14  
18 15 stay (p=0.296), or between age groups and type of surgery (p=0.678).

19 10 A total of 10,015 (14.8%, 95% CI [14.5 – 15.0]) discharges were reoperations; 517  
20 11 (0.8%, 95%CI [[0.8 – 0.9]) occurred between 30 and 90 days after the index discharge, 2611  
21 12 (3.8%, 95%CI [3.7 – 4.0]) between 91 days and 12 months, and 2429 (3.6%, 95%CI [3.5 – 3.7])  
22 13  
23 14 between the first and second year. There was a large decrease in the proportion of patients  
24 15  
25 16 who received reoperations during the 15-year period: from 21.6% in 1999 to 2.3% in 2013.

26 15 **Insert Table 2 here**

## 27 16

## 28 17 **DISCUSSION**

29 18 This national study identified a significant increase in lumbar spine surgery in Norway from  
30 19 1999 to 2013. This increase was most marked in the use of simple surgical procedures like  
31 20 microsurgical discectomy and/or decompression surgery, in particular among elderly  
32 21 patients above 75 years of age. The increase in complex surgery, for the most part fusion  
33 22 surgery, was also most prevalent in the oldest age group.

34 23 The main strength of the current study is that it covers all spinal surgery procedures  
35 24 carried out in public hospitals in Norway during a 15-year period, except for surgery due to  
36 25 red flag diagnosis (like cancer, spinal infections, inflammatory diseases) or trauma. A  
37 26 potential weakness is the risk of misclassification of diagnoses or procedures [23]. The lack  
38 27 of accuracy of diagnosis in such registries has been reported and a systematic review on this  
39 28 field has showed that procedure coding might be more accurate than coding based upon  
40 29 diagnosis [24]. Therefore, in order to reduce misclassification in the current study, we used  
41 30 the surgical procedure coding in combination with diagnoses when classifying the types of

1  
2  
3 1 surgery provided. Further, we argue that the risk of misclassification is minor in this study as  
4  
5 2 we assessed two large and different types of spinal surgery (simple versus complex spinal  
6  
7 3 surgery procedures). As expected, the two groups differ with respect to length of hospital  
8  
9 4 stay, complications, and reoperations. We considered classifying spinal surgery into simple  
10  
11 5 and complex procedures, useful when reporting trends in spinal surgery within a large and  
12  
13 6 heterogeneous dataset such as hospital administrative data used in this study. Finally,  
14  
15 7 another weakness is that the present material did not include surgery conducted in private  
16  
17 8 clinics/hospitals. Private for-profit hospitals in Norway perform currently approximately 7%  
18  
19 9 of the total number of elective surgical procedures [13], usually as day surgeries. This might  
20  
21 10 have contributed to the increase in complications in public hospitals after private surgery  
22  
23 11 became common in 2007. Private surgery would leave the public hospitals to deal with the  
24  
25 12 more complex cases and procedures during this portion of the study period (2007–2013). A  
26  
27 13 previous study comparing surgery due to disc herniation in public and private hospitals in  
28  
29 14 Norway, showed that patients operated by simple procedures due to lumbar disc herniation  
30  
31 15 in public hospitals were older, and had more comorbidity and other risk factors associated  
32  
33 16 with unfavorable outcomes compared to those operated in the private clinics [25].

34 17 There are very few published papers that provide an overview of *all* types of spinal  
35  
36 18 surgery for degenerative disorders over an extended time period. There is one study by  
37  
38 19 Davis [17], that presents trends in both cervical and lumbar spine surgery in the USA from  
39  
40 20 1979 to 1990. It states that hospitalization rates for all types of lumbar spinal surgery  
41  
42 21 (including fusion, disc and exploration/decompression) increased markedly among both  
43  
44 22 sexes. In line with Davis et al, our results demonstrate that more men than women receive  
45  
46 23 lumbar spine surgery. Several studies on different types of spinal surgery, such as disc  
47  
48 24 herniation and spinal fusion surgery, have been published [2-11]. In general, the findings in  
49  
50 25 the present paper are in accordance with the other studies from Scandinavian countries [3,  
51  
52 26 5] and Germany [6], which show increased rates for lumbar disc herniation and spinal  
53  
54 27 stenosis surgery. The increase reported in most of the western-European countries is not as  
55  
56 28 large as that found in the United States [2, 4, 7, 9, 11] and United Kingdom [10].  
57  
58 29 Furthermore, these results also fit with the overall national healthcare expenditure across  
59  
60 30 countries; in Norway it is 10.4% of the GDP, which is similar to other western-European  
31  
32 countries such as Germany and Sweden, as compared to 17.1% in the United States [18].

1  
2  
3 1 The increase in public lumbar spine surgery in Norway is difficult to understand,  
4  
5 2 because only minor increases in the incidence and severity of low back pain have been  
6  
7 3 reported in the Norwegian population [19]. However, parts of the increase may be explained  
8  
9 4 by the growing number of elderly patients and the increase of hospital surgeons in general  
10  
11 5 [20]. In addition, there has been a substantial rise in the use of radiographic examinations  
12  
13 6 such as MRI, which might have led to more surgery [21]. The large variations in spinal  
14  
15 7 surgery rates may also be explained by a lack of uniform and consensus-based criteria for  
16  
17 8 surgery, financial incentives for surgical interventions, and new technology [7-10, 22].

18 9 The mean complication rate during the study period was low, but it increased to 2.4%  
19  
20 10 at the end of the period. This increase may be explained by the increase in reoperations  
21  
22 11 within 30 days at the end of the 15-year period. Hence, there seems to be a trend towards a  
23  
24 12 shorter timeframe for reoperations by the end of this 15-year time period, a trend which is  
25  
26 13 also reported in the Swedish study of lumbar disc herniation surgery between 1987 and  
27  
28 14 1999 [3]. Our finding that older patients were less likely to experience complications and  
29  
30 15 receive reoperations compared with the younger and middle-aged groups is hard to explain.  
31  
32 16 It may be that surgeons are more hesitant to reoperate older people, and are more selective  
33  
34 17 with respect to other potential risk factors for complications after surgery.

## 35 18 **CONCLUSION**

36  
37 19 There was a substantial increase in spinal surgery in Norway from 1999 to 2013. The rise in  
38  
39 20 number of surgeries, in particular among elderly people, represents a significant workload  
40  
41 21 for hospitals in Norway, and a challenge to the public healthcare system in terms of meeting  
42  
43 22 the increased burden associated with low back pain in an aging population.

### 44 45 46 23 **Author of affiliations:**

47  
48  
49 24 <sup>1</sup> Research and Communication Unit for Musculoskeletal Health, Oslo University Hospital, Oslo,  
50  
51 25 Norway

52 26 <sup>2</sup> Faculty of Health Science, OsloMet – Oslo Metropolitan University, Oslo, Norway

53  
54 27 <sup>3</sup> Department of Neurology, Oslo University Hospital, Oslo, Norway

55  
56 28 <sup>4</sup> Institute of Clinical Medicine, Faculty of Medicine, University of Oslo, Norway

57 29 <sup>5</sup> Department of Rheumatology, Østfold Hospital Trust, Grålum, Norway

58  
59 30 <sup>6</sup> Division for Health Services, Norwegian Institute of Public Health, Oslo, Norway  
60

1  
2  
3 1 <sup>7</sup> Norwegian Registry for Spine Surgery (NORspine), University Hospital of Northern Norway, Tromsø,  
4 Norway  
5 2

6 3 <sup>8</sup> Department of Neurosurgery, University Hospital of Northern Norway, Tromsø, Norway  
7

8 4 <sup>9</sup> Institute of Clinical Medicine, The Arctic University (UiT) of Norway, Tromsø, Norway  
9

10 5 <sup>10</sup> Division of Clinical Neuroscience, Oslo University Hospital, Oslo, Norway  
11  
12 6

13  
14 7 **CORRESPONDING AUTHOR'S EMAIL ADDRESS:** [mgrotle@oslomet.no](mailto:mgrotle@oslomet.no)  
15  
16

17 8 **Contributors;** MG, JH and JAZ designed the study. MG and MCS analysed the data, and JAZ, OF, LG,  
18 and TKS contributed in discussion of analyses and results presentation. MG wrote the manuscript  
19 with all authors contributing in reading, commenting and approving the final manuscript.  
20  
21

22  
23 11 **The original protocol for the study** can be delivered upon request to the corresponding author.  
24  
25

26 12 **Funding statement:** This work was supported by the South-Eastern Norway Regional Health  
27 Authority, grant number 2013030.  
28  
29

30 14 **Competing interests:** There are no competing interests to be reported in this study.  
31  
32

33 15 **Any checklist and flow diagram for the appropriate reporting statement:** not relevant  
34  
35

36 16 **Patient consent:** not required  
37  
38

39 17 **Ethics approval:** The study was approved by the Norwegian Data Inspectorate (2014/14413) and the  
40 Norwegian Regional Ethics Committee (2013/1662, REC south-east D).  
41  
42

43 19 **Data sharing statement:** It is not possible to participate in data sharing due to ethical reasons and  
44 strict data protection regulation in Norway.  
45  
46

47  
48 21 **Figure legends:**  
49

50  
51 22 Fig 1. Annual surgery rates per 100,000 population of simple and complex lumbar surgical procedures  
52 in Norway from 1999 to 2013.  
53  
54

55 24 Fig 2. Annual incidence per 100,000 population of simple and complex lumbar surgery in Norway  
56 from 1999 to 2013, according to gender.  
57  
58  
59  
60

1  
2  
3 1 Fig 3. Annual incidence per 100,000 inhabitants of simple (upper figure) and complex (lower figure)  
4 2 surgery in Norway from 1999 to 2013, according to age groups.

### 3 REFERENCES

- 4 1. Global Burden of Disease, Injury Incidence, Prevalence Collaborators. Global, regional, and  
5 national incidence, prevalence, and years lived with disability for 310 diseases and injuries,  
6 1990–2015: a systematic analysis for the Global Burden of Disease Study 2015. *Lancet* 2016;  
7 **388**: 1545–602.
- 8 2. Deyo RA, Mirza SK, Martin BI, Kreuter W, Goodman DC, Jarvik JG. Trends, major medical  
9 complications, and charges associated with surgery for lumbar spinal stenosis in older adults.  
10 *JAMA* 2010 Apr 7;303(13):1259-65.
- 11 3. Jansson KA, Nemeth G, Granath F, Blomqvist P. Surgery for herniation of a lumbar disc in  
12 Sweden between 1987 and 1999. An analysis of 27,576 operations. *J Bone Joint Surg Br* 2004  
13 Aug;86(6):841-7.
- 14 4. Rajae SS, Bae HW, Kanim LE, Delamarter RB. Spinal fusion in the United States: analysis of  
15 trends from 1998 to 2008. *Spine (Phila Pa 1976 )* 2012 Jan 1;37(1):67-76.
- 16 5. Rasmussen S, Jensen CM, Iversen MG, Kehlet H. [Lumbar fusion surgery for degenerative  
17 conditions in Denmark 2005-2006]. *Ugeskr Laeger* 2009 Sep 21;171(39):2804-7.
- 18 6. Steiger HJ, Kramer M, Reulen HJ. Development of neurosurgery in Germany: comparison of  
19 data collected by polls for 1997, 2003, and 2008 among providers of neurosurgical care.  
20 *World Neurosurg* 2012 Jan;77(1):18-27.
- 21 7. Weinstein JN, Lurie JD, Olson PR, Bronner KK, Fisher ES. United States' trends and regional  
22 variations in lumbar spine surgery: 1992-2003. *Spine (Phila Pa 1976 )* 2006 Nov  
23 1;31(23):2707-14.
- 24 8. Kim P, Kurokawa R, Itoki K. Technical advancements and utilization of spine surgery –  
25 international disparities in trend-dynamics between Japan, Korea and the USA. *Neurol Med  
26 Chir (Tokyo)* 2010;50;853-8.
- 27 9. Yoshihara H and Yoneoka D. National trends in the surgical treatment for lumbar degenerative  
28 disc disease: United States, 2000 to 2009. *Spine J* 2015;15(2);265-71.
- 29 10. Sivasubramaniam V, Patel HC, Ozdemir BA. Trends in hospital admissions and surgical  
30 procedures for degenerative lumbar spine disease in England: a 15-year time-series study.  
31 *BMJ Open*, 2015. 5(12): p. e009011.
- 32 11. Cherkin DC, Deyo RA, Loeser JD, Bush T, Waddell G. An international comparison of back  
33 surgery rates. *Spine (Phila Pa 1976 )* 1994 Jun 1;19(11):1201-6.
- 34 12. Statistics Norway. Available <https://www.ssb.no/en/statbank>

- 1  
2  
3 1 13. Pedersen, M., Kalseth, B., Lilleeng, S.E., Mehus, K.H., Pedersen, P.B., Sitter, M., *Private*  
4 *aktører i spesialisthelsetjenesten. Omfang og utvikling 2010-2014*. Norwegian Directorate of  
5 2 *Health* 2016. Available at:  
6 3  
7 4 [https://helsedirektoratet.no/Lists/Publikasjoner/Attachments/1159/Private%20akt%C3%B8er%20i%20spesialisthelsetjenesten.%20Omfang%20og%20utvikling%202010-2014.%20IS-](https://helsedirektoratet.no/Lists/Publikasjoner/Attachments/1159/Private%20akt%C3%B8er%20i%20spesialisthelsetjenesten.%20Omfang%20og%20utvikling%202010-2014.%20IS-2450.pdf)  
8 5 [2450.pdf](https://helsedirektoratet.no/Lists/Publikasjoner/Attachments/1159/Private%20akt%C3%B8er%20i%20spesialisthelsetjenesten.%20Omfang%20og%20utvikling%202010-2014.%20IS-2450.pdf).  
9 6  
10 7 14. Hassani S et al. *30-Day Survival Probabilities as a Quality Indicator for Norwegian Hospitals:*  
11 8 *Data Management and Analysis*. PloS one, 2015. 10(9): p. e0136547  
12 9  
13 15. *Nordic Centre for Classifications in Health Care. NOMESCO Classification of Surgical*  
14 10 *Procedures (NCSP)* . Available at: [http://www.nordclass.se/ncsp\\_e.htm](http://www.nordclass.se/ncsp_e.htm).  
15 11  
16 16. Solberg, T. *NORspine Annual report 2013*. Available at:  
17 12 <https://www.kvalitetsregistre.no/sites/default/files/http->  
18 13 [/www.kvalitetsregistre.no/getfile.php/Norsk/Bilder/Offentliggj-C3-B8ring-2014/-C3-](https://www.kvalitetsregistre.no/sites/default/files/http-)  
19 14 [rsrapport\\_NKR\\_2013--2-.pdf](https://www.kvalitetsregistre.no/sites/default/files/http-).  
20 15  
21 17. Davis H. Increasing Rates of Cervical and Lumbar Spine Surgery in the United States, 1979 –  
22 16 1990. *Spine* 1994;19:1117-1124  
23 17  
24 18. <https://data.oecd.org/healthres/health-spending.htm>  
25 18  
26 19. Kinge JM, Knudsen AK, Skirbekk V, Vollset SE. Musculoskeletal disorders in Norway:  
27 19 prevalence of chronicity and use of primary and specialist health care services. *BMC*  
28 20 *musculoskeletal disorders* 2015;16:75.  
29 21  
30 20. Welle-Watne, C., et al., *Utviklingen for leger og legestillinger i primær- og*  
31 22 *spesialisthelsetjenesten – Rapport 2014*. Norwegian Directorate of Health 2014. Available at:  
32 23 <https://helsedirektoratet.no/Lists/Publikasjoner/Attachments/957/Utviklingen-for-leger-og->  
33 24 [legestillinger-i-prim%C3%A6r-og-spesialisthelsetjenesten-2014-IS-2252.pdf](https://helsedirektoratet.no/Lists/Publikasjoner/Attachments/957/Utviklingen-for-leger-og-) .  
34 25  
35 21. Borretzen, I., K.B. Lysdahl, and H.M. Olerud, *Diagnostic radiology in Norway trends in*  
36 26 *examination frequency and collective effective dose*. *Radiat Prot Dosimetry*, 2007. 124(4): p.  
37 27 339-47.  
38 28  
39 22. Chou R, Baisden J, Carragee EJ, Resnick DK, Shaffer WO, Loeser JD. Surgery for low back pain:  
40 29 a review of the evidence for an American Pain Society clinical practice guideline. *Spine* 2009;  
41 30 **34**: 1094–109.  
42 31  
43 23. Gavriellov-Yusim, N. and M. Friger, *Use of administrative medical databases in population-*  
44 32 *based research*. *J Epidemiol Community Health*, 2014. 68(3): p. 283-7.  
45 33  
46 24. Burns, E.M., et al., *Systematic review of discharge coding accuracy*. *J Public Health (Oxf)*,  
47 34 2012. 34(1): p. 138-48.  
48  
49  
50  
51  
52  
53  
54  
55  
56  
57  
58  
59  
60

1  
2  
3  
4  
5  
6  
7  
8  
9  
10  
11  
12  
13  
14  
15  
16  
17  
18  
19  
20  
21  
22  
23  
24  
25  
26  
27  
28  
29  
30  
31  
32  
33  
34  
35  
36  
37  
38  
39  
40  
41  
42  
43  
44  
45  
46  
47  
48  
49  
50  
51  
52  
53  
54  
55  
56  
57  
58  
59  
60

1 25. Grotle M, Solberg T, Storheim K, Laerum E, Zwart JA. Public and private health service in  
2 Norway: a comparison of patient characteristics and surgery criteria for patients with nerve  
3 root affections due to discus herniation. Eur Spine J. 2014;23(9):1984-91. PMID: 24898309  
4

For peer review only

**Table 1.** Characteristics of 67,855 lumbar spine operations in 57,081 patients in Norway, 1999 to 2013

|                   | No. of operations (%) | Length of stay, median days [range, IQR] |
|-------------------|-----------------------|------------------------------------------|
| Age (years)       |                       |                                          |
| 18-39             | 16396 (24.2)          | 4.2 [724, 4.4]                           |
| 40-59             | 28237 (41.7)          | 6.3 [618, 4.7]                           |
| 60-75             | 16160 (23.9)          | 5.9 [250, 5.8]                           |
| > 75              | 6910 (10.2)           | 7.2 [226, 6.7]                           |
| Missing           | 152                   |                                          |
| Gender            |                       |                                          |
| Male              | 34902 (51.4)          | 4.7 [239, 4.4]                           |
| Female            | 32801 (48.3)          | 6.0 [724, 5.8]                           |
| Missing           | 152                   |                                          |
| Year of operation |                       |                                          |
| 1999              | 3460 (5.1)            | 7.1 [149.9, 6.0]                         |
| 2000              | 3996 (5.9)            | 7.0 [420, 6.0]                           |
| 2001              | 4200 (6.2)            | 7.0 [138, 6.0]                           |
| 2002              | 3865 (5.7)            | 6.2 [202, 6.0]                           |
| 2003              | 4557 (6.7)            | 6.1 [238, 5.4]                           |
| 2004              | 4396 (6.5)            | 6.1 [250, 5.8]                           |
| 2005              | 4572 (6.7)            | 6.0 [724, 5.3]                           |
| 2006              | 4422 (6.5)            | 5.8 [138, 5.5]                           |
| 2007              | 4255 (6.3)            | 5.1 [618, 5.0]                           |
| 2008              | 4164 (6.1)            | 4.9 [179, 4.3]                           |



|                   |              |                |
|-------------------|--------------|----------------|
| 2009              | 4449 (6.6)   | 4.2 [142, 4.9] |
| 2010              | 5130 (7.6)   | 4.1 [183, 4.8] |
| 2011              | 5241 (7.7)   | 4.0 [210, 4.2] |
| 2012              | 5597 (8.2)   | 4.1 [165, 4.2] |
| 2013              | 5551 (8.2)   | 3.8 [219, 4.1] |
| Missing           | 0            | 0              |
| Type of surgery   |              |                |
| Simple            | 56764 (83.7) | 4.3 [724, 4.3] |
| Complex           | 11091 (16.3) | 8.2 [420, 5.7] |
| No. of operations |              |                |
| One               | 57029 (84.0) | 5.1 [724, 5.0] |
| Two               | 8623 (12.7)  | 5.2 [618, 5.1] |
| Three             | 1602 (2.4)   | 6.2 [205, 6.0] |
| ≥ Four            | 467 (0.7)    | 6.9 [115, 4.4] |
| Missing           | 134          | 134            |

1  
2  
3

**Table 2.** Multivariate logistic regression model analysis of factors associated with complications (including reoperation within 30 days) due to lumbar spine surgery in Norway from 1999 to 2013 (N=67,855)

|                           | Complications<br>(n=977) | OR   | Lower 95%<br>CI | Upper 95%<br>CI |
|---------------------------|--------------------------|------|-----------------|-----------------|
| Age (years)               |                          |      |                 |                 |
| 18-39                     | 250                      | Ref  |                 |                 |
| 40-59                     | 460                      | 0.97 | 0.83            | 1.13            |
| 60-75                     | 198                      | 0.61 | 0.50            | 0.74            |
| > 75                      | 69                       | 0.51 | 0.39            | 0.67            |
| Missing                   | 152                      |      |                 |                 |
| Gender                    |                          |      |                 |                 |
| Male                      | 510                      | Ref  |                 |                 |
| Female                    | 467                      | 0.90 | 0.79            | 1.02            |
| Missing                   | 152                      |      |                 |                 |
| Length of stay<br>(cont.) |                          | 1.02 | 1.01            | 1.02            |
| Type of surgery           |                          |      |                 |                 |
| Simple                    | 659                      | Ref  |                 |                 |
| Complex                   | 318                      | 2.34 | 2.04            | 2.69            |
| Year of operation         |                          |      |                 |                 |
| 1999                      | 24                       | Ref  |                 |                 |
| 2000                      | 29                       | 0.98 | 0.57            | 1.71            |
| 2001                      | 29                       | 1.03 | 0.60            | 1.77            |
| 2002                      | 33                       | 1.31 | 0.77            | 2.22            |

## Trends in lumbar spine surgery

|         |     |      |      |      |
|---------|-----|------|------|------|
| 2003    | 44  | 1.52 | 0.92 | 2.50 |
| 2004    | 41  | 1.46 | 0.88 | 2.43 |
| 2005    | 67  | 2.23 | 1.39 | 3.57 |
| 2006    | 60  | 2.25 | 1.40 | 3.63 |
| 2007    | 58  | 2.25 | 1.39 | 3.64 |
| 2008    | 56  | 2.29 | 1.42 | 3.71 |
| 2009    | 80  | 3.12 | 1.97 | 4.94 |
| 2010    | 89  | 3.03 | 1.93 | 4.78 |
| 2011    | 93  | 3.03 | 1.93 | 4.77 |
| 2012    | 140 | 4.31 | 2.79 | 4.67 |
| 2013    | 134 | 4.16 | 2.68 | 6.44 |
| Missing | 134 |      |      |      |

1

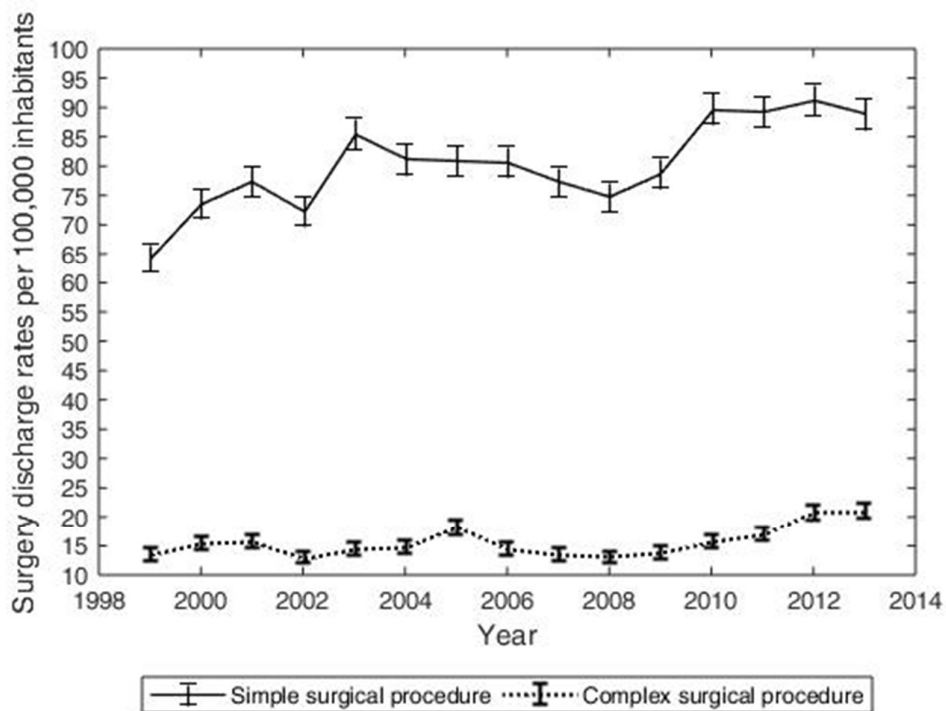

Fig 1. Annual surgery rates per 100,000 population of simple and complex lumbar surgical procedures in Norway from 1999 to 2013.

1  
2  
3  
4  
5  
6  
7  
8  
9  
10  
11  
12  
13  
14  
15  
16  
17  
18  
19  
20  
21  
22  
23  
24  
25  
26  
27  
28  
29  
30  
31  
32  
33  
34  
35  
36  
37  
38  
39  
40  
41  
42  
43  
44  
45  
46  
47  
48  
49  
50  
51  
52  
53  
54  
55  
56  
57  
58  
59  
60

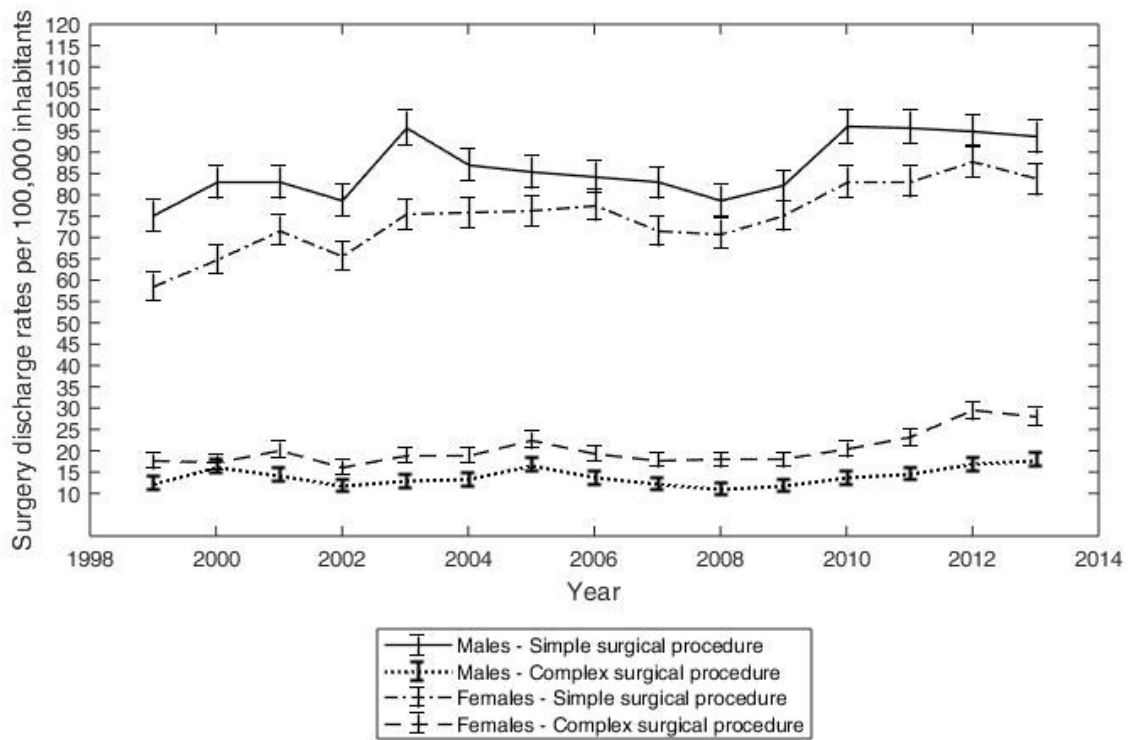

Fig 2. Annual incidence per 100,000 population of simple and complex lumbar surgery in Norway from 1999 to 2013, according to gender.

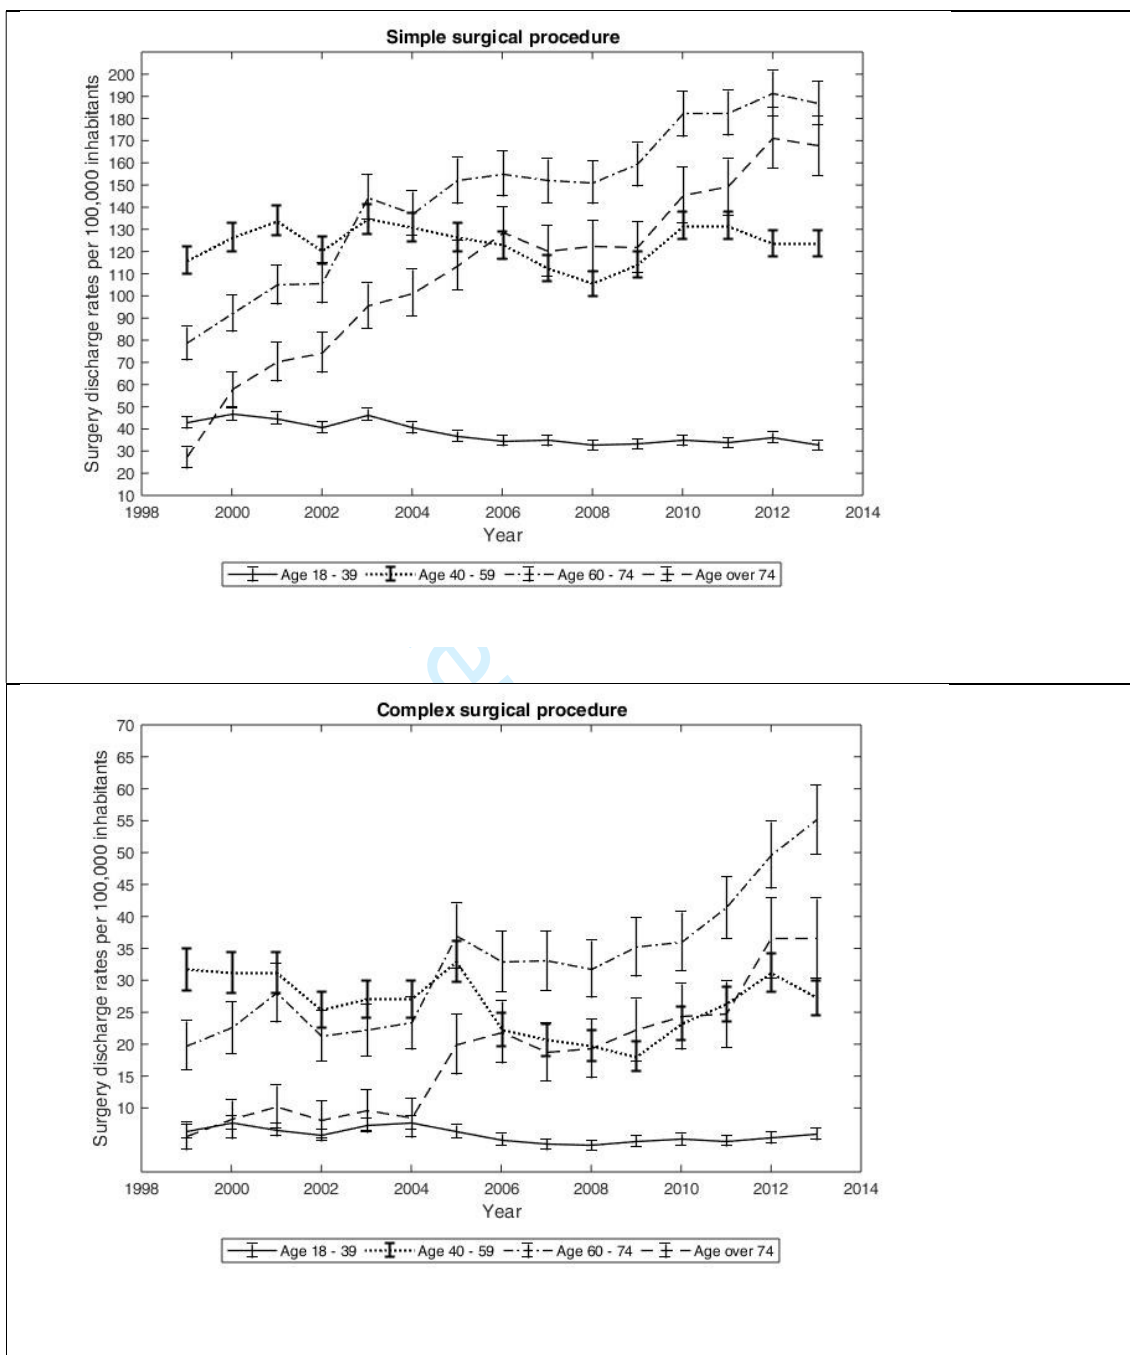

Fig 3. Annual incidence per 100,000 inhabitants of simple (upper figure) and complex (lower figure) surgery in Norway from 1999 to 2013, according to age groups.

# BMJ Open

## Lumbar spine surgery across 15-years: trends, complications and reoperations in a longitudinal observational study from Norway

|                                 |                                                                                                                                                                                                                                                                                                                                                                                                                                                                                                                                                                                                                                                                                                                                                                                                                                                                                                                                         |
|---------------------------------|-----------------------------------------------------------------------------------------------------------------------------------------------------------------------------------------------------------------------------------------------------------------------------------------------------------------------------------------------------------------------------------------------------------------------------------------------------------------------------------------------------------------------------------------------------------------------------------------------------------------------------------------------------------------------------------------------------------------------------------------------------------------------------------------------------------------------------------------------------------------------------------------------------------------------------------------|
| Journal:                        | <i>BMJ Open</i>                                                                                                                                                                                                                                                                                                                                                                                                                                                                                                                                                                                                                                                                                                                                                                                                                                                                                                                         |
| Manuscript ID                   | bmjopen-2018-028743.R1                                                                                                                                                                                                                                                                                                                                                                                                                                                                                                                                                                                                                                                                                                                                                                                                                                                                                                                  |
| Article Type:                   | Research                                                                                                                                                                                                                                                                                                                                                                                                                                                                                                                                                                                                                                                                                                                                                                                                                                                                                                                                |
| Date Submitted by the Author:   | 06-Jun-2019                                                                                                                                                                                                                                                                                                                                                                                                                                                                                                                                                                                                                                                                                                                                                                                                                                                                                                                             |
| Complete List of Authors:       | Grotle, Margreth; Hogskolen i Oslo og Akershus, Department of Physiotherapy; Oslo universitetssykehus Ullevål, Research and Communication Unit for Musculoskeletal Health<br>Småstuen, Milada; Oslo Metropolitan University, Department of Nursing and Health Promotion<br>Fjeld, Olaf; Oslo universitetssykehus Ullevål, Research and Communication Unit for Musculoskeletal Disorders<br>Grøvre, Lars; Sykehuset Ostfold HF,<br>Helgeland, Jon; Nasjonalt folkehelseinstitutt, Division of Health Services<br>Storheim, Kjersti; Research and Communication Unit for Musculoskeletal Health (FORMI); Faculty of Health Sciences, Oslo Metropolitan University<br>Solberg, Tore; University Hospital of North Norway, Neurosurgery; North Norway Health Authority, The Norwegian Registry for Spine Surgery<br>Zwart, John-Anker; Oslo University Hospital, Department of Neurology and FORMI; University of Oslo, Faculty of Medicine |
| <b>Primary Subject Heading</b>: | Surgery                                                                                                                                                                                                                                                                                                                                                                                                                                                                                                                                                                                                                                                                                                                                                                                                                                                                                                                                 |
| Secondary Subject Heading:      | Surgery, Health services research                                                                                                                                                                                                                                                                                                                                                                                                                                                                                                                                                                                                                                                                                                                                                                                                                                                                                                       |
| Keywords:                       | Neurosurgery < SURGERY, Orthopaedic & trauma surgery < SURGERY, EPIDEMIOLOGY                                                                                                                                                                                                                                                                                                                                                                                                                                                                                                                                                                                                                                                                                                                                                                                                                                                            |
|                                 |                                                                                                                                                                                                                                                                                                                                                                                                                                                                                                                                                                                                                                                                                                                                                                                                                                                                                                                                         |

SCHOLARONE™  
Manuscripts

1  
2  
3  
4 1 **Lumbar spine surgery across 15-years:**  
5 2 **trends, complications and reoperations in a longitudinal observational study**  
6 3  
7 4 **from Norway**

9 4 Margreth Grotle, PhD<sup>1,2</sup>, Milada Cvancarova Småstuen, PhD<sup>1,2</sup>, Olaf Fjeld, MD<sup>1,3,4</sup>, Lars Grøvle, MD,  
11 5 PhD<sup>5</sup>, Jon Helgeland, MSc<sup>6</sup>, Kjersti Storheim, PhD<sup>1,2</sup>, Tore Kristian Solberg, MD, PhD<sup>7,8,9</sup>, John-Anker  
13 6 Zwart, MD, PhD<sup>4,10</sup>

15  
16 7 **Corresponding author:** [mgrotle@oslomet.no](mailto:mgrotle@oslomet.no)

17  
18 8 **ABSTRACT**

19 9 Studies from different Western countries have reported a rapid increase in spinal surgery  
21 10 rates, an increase that exceeds by far the growing incidence rates of spinal disorders in the  
22 11 general population. There are few studies covering all lumbar spine surgery and no previous  
23 12 studies from Norway.

24 13 **Objectives**

25 14 The purpose of this study was to investigate trends in all lumbar spine surgery in Norway  
26 15 over 15 years, including length of hospital stay, and rates of complications and reoperations.

27 16 **Design**

28 17 A longitudinal observational study over 15 year using hospital patient administrative data  
29 18 and sociodemographic data from the National Registry in Norway.

30 19 **Setting and participants**

31 20 Patients aged  $\geq 18$  years discharged from Norwegian public hospitals between 1999 and  
32 21 2013.

33 22 **Outcome measures**

34 23 Annual rates of simple (microsurgical discectomy, decompression) and complex surgical  
35 24 procedures (fusion, disc prosthesis) in the lumbar spine.

36 25 **Results**

37 26 The rate of lumbar spine surgery increased by 54%, from 78 (95%CI [75-80]) to 120 [107-113]  
38 27 per 100,000, from 1999 to 2013. More men had simple surgery whereas more women had  
39 28 complex surgery. Among elderly people over 75 years, lumbar surgery increased by a factor



1  
2  
3 1 of five during the 15-year period. The rates of complications were low, but increased from  
4  
5 2 0.7% in 1999 to 2.4% in 2013.  
6  
7

### 8 **Conclusions**

9  
10 4 There was a substantial increase in lumbar spine surgery in Norway from 1999 to 2013,  
11  
12 5 similar to trends in other Western world countries. The rise in lumbar surgery among elderly  
13  
14 6 people represents a significant workload and challenge for health services, given our aging  
15  
16 7 population.  
17

### 18 **Key Words**

19  
20 9 neurosurgery, orthopaedic & trauma surgery, epidemiology  
21  
22

### 23 **Strengths and limitations of this study**

- 24  
25  
26 11 1. This study covers all lumbar spine surgery in Norwegian public hospitals across 15  
27  
28 12 years, and all annual rates during the time period were adjusted for age and gender.  
29  
30 13 2. In order to minimize the risk of misclassification, surgical procedure codings were  
31  
32 14 used in combination with diagnoses to group all surgery into two main categories;  
33  
34 15 simple surgery such as microdiscectomy and decompression, and complex surgery  
35  
36 16 such as fusion and disc prosthesis .  
37  
38 17 3. This study did not include data from private clinics, which currently cover  
39  
40 18 approximately 7% of the elective surgery in Norway.  
41  
42 19 4. Cases for non-lumbar indications, cancer, trauma, infection, pregnancy and  
43  
44 20 inflammation were excluded.  
45  
46 21 5. The design and material of this study did not allow us to adjust for all potential  
47  
48 22 confounding factors, that might have influenced the multivariate analyses of  
49  
50 23 complications due to surgery .  
51  
52  
53  
54  
55  
56  
57  
58  
59  
60

## 1 INTRODUCTION

2 Low back pain is the leading cause of years lost to disability worldwide, and this burden is  
3 increasing as our population ages [1]. Low back pain was responsible for 60.1 million  
4 disability-adjusted life years in 2015, an increase of 54% since 1990, with the largest increase  
5 seen in low- and middle-income countries [1]. The economic burden is extensive, mostly due  
6 to sickness absence costs, but also due to the high cost of diagnostic tests and, in particular,  
7 spinal surgery [1]. The use of spinal surgery has increased considerably in many Western  
8 countries over the past 20 years [2-11]. This increase cannot be explained by higher  
9 incidence or prevalence rates of spinal disorders [2-7], and there are marked variations in  
10 spinal surgery rates between and within countries [7, 11].

11 National administrative databases provide important information regarding health  
12 services, which is crucial for planning and allocating healthcare resources. Many previous  
13 studies on the rates of all types of lumbar surgery come from the USA [2, 4, 7, 9]. There are  
14 also studies from Germany [6], United Kingdom [10], Sweden [3], and Denmark [5], but none  
15 from Norway. Moreover, none of the published studies provide an overview of *all* types of  
16 lumbar spinal surgery including simple surgical procedures such as microsurgical discectomy  
17 and/or decompression, and complex procedures such as fusions and disc prosthesis. An  
18 overview of all spinal surgery, including complication and reoperation rates, will provide  
19 important information for the evaluation of current public health services, as well as the  
20 planning of future services.

21 Hence, the primary aim of this study was to investigate the longitudinal trends in  
22 hospital discharges of *all* surgical procedures for lumbar spine disorders in Norway from  
23 1999 to the end of 2013. Further, length of hospital stay, and rates of complications and  
24 reoperations over the 15-year period were investigated.

## 26 MATERIAL AND METHODS

### 27 *Design*

28 This was a retrospective, longitudinal, observational study comprising all discharges from  
29 Norwegian public hospitals over a 15-year period (1999–2013). Norway (population of 4.46  
30 million in 1999 and 5.05 million in 2013) [12] has a national healthcare system divided into

1  
2  
3 1 four health regions (South-East, West, Middle, and North). Private surgery, primarily day  
4 surgery, became available after 2007. It is estimated that currently approximately 7% of all  
5  
6  
7 3 elective spinal surgeries take place in the private sector [13].  
8  
9

#### 10 4 **Data source**

11  
12  
13 5 Hospital patient administrative data was retrieved from a national database located at the  
14 Norwegian Knowledge Centre for the Health Services. The database was initially established  
15 6 as a part of the project “*Post-hospitalization survival rates in Norway as indicators of hospital*  
16 7 *quality*”. A detailed description of the methods employed in data collection is published  
17 8 elsewhere [14]. Patient administrative data for the period 1999–2009 were extracted  
18 9 directly from all Norwegian public hospitals, and, for the period 2010–2013, from the  
19 10 Norwegian Patient Registry (NPR). Norwegian hospitals were mandated to submit data to  
20 11 the NPR since 2010. Each hospitalization record contains a personal identifier, codes for  
21 12 diagnoses, medical procedures, and date and time of admission and discharge. Data from  
22 13 the National Registry provided by Statistics Norway made it possible to link the NPR data to  
23 14 patients’ age, sex, and municipality of residence. Each entry in the database represents a  
24 15 single hospitalization record including diagnoses based on ICD-10 and surgical procedure  
25 16 codes based on the NOMESCO Classification of Surgical Procedures (NCSP) [15]. The  
26 17 NOMESCO Classification has been used in Norway, Sweden, Denmark, Finland, Iceland and  
27 18 Estonia since 1999. The NSCP algorithm used in this study has been validated by the  
28 19 Norwegian registry for spine surgery (NORspine) [16] and the Norwegian patient registry  
29 20 under the Norwegian Directorate of Health [17].  
30  
31  
32  
33  
34  
35  
36  
37  
38  
39  
40  
41  
42  
43  
44

#### 45 22 **Patient and Public Involvement**

46  
47  
48 23 Due to the use of administrative data in this study patients or public were not involved in  
49 24 this project.  
50  
51

#### 52 25 53 26 **Selection of sample and classification of outcome**

54  
55  
56 27 Inclusion criteria were: age  $\geq 18$  years and a lumbar spine diagnosis code (ICD-codes from  
57 28 M40 to M54). Exclusion criteria were: diagnoses related to the cervical, thoracic, or an  
58  
59  
60

1  
2  
3 1 unspecified region of the spine, as well as diagnoses indicating cancer, trauma, spinal  
4  
5 2 fractures, pregnancy, spinal infections, and inflammatory diseases.  
6  
7  
8 3 For identifying discharges with *simple* surgical procedures defined as discectomy and/or  
9  
10 4 decompression, the following NCSP ABC codes were used [15]: ABC07, ABC16, ABC26,  
11  
12 5 ABC28, ABC36, ABC40, ABC56, ABC66, and ABC99. The *complex* surgical procedures included  
13  
14 6 procedure codes for fusion surgery (NAG and NAN), disc prosthesis (NAB and NAC), and  
15  
16 7 revision surgery (NAT and NAU) [15]. Further, NAE, NAF, NAH, NAM, NAT, and NAU  
17  
18 8 procedure codes were included if coexisting with NCSP codes indicating a complex  
19  
20 9 procedure. This is similar to the algorithm used in the NORspine [16] and the Norwegian  
21  
22 10 patient registry [17]. A list of all included procedure codes can be delivered by contacting the  
23  
24 11 corresponding author.

25  
26 12 *Complications* were identified by the following ICD-10 codes occurring within 30 days  
27  
28 13 after a discharge: postoperative hematoma (T81.0), post-procedural shock (T81.1),  
29  
30 14 unintentional puncture/laceration (T81.2), disruption of wound/wound dehiscence (T81.3),  
31  
32 15 infection following a procedure (T81.4), foreign body accidentally left in body following  
33  
34 16 procedure (T81.5), acute reaction to foreign body accidentally left during a procedure  
35  
36 17 (T81.6), vascular complications following a procedure (T81.7), unspecified or other  
37  
38 18 complications of procedure, either upon initial surgical admission or upon readmission  
39  
40 19 (T81.8-9), and complications during anesthesia (T88.4-5). NAW (reoperation) and AW  
41  
42 20 (reoperations of the nervous system) procedure codes that occurred within 30 days after the  
43  
44 21 initial surgery were also classified as *complications*. NAW and AW procedure codes occurring  
45  
46 22 later than 30 days after an initial procedure were classified as *reoperations*.

### 47 ***Background characteristics***

48  
49  
50 24 Patient age, gender, length of hospital stay, and number of operations were included. Age  
51  
52 25 was categorized as 18–39 years, 40–59 years, 60–75 years, or >75 years.

### 53 54 55 26 ***Statistical analyses***

56  
57  
58 27 Annual surgical incidence rates were calculated per 100,000 inhabitants based on the size of  
59  
60 28 the total Norwegian population on Jan 1<sup>st</sup> of each analyzed year, retrieved from Statistics

1  
2  
3 1 Norway [12]. Surgical incidence rates across age groups, gender, and type of surgery  
4 (simple/complex) were compared with  $\chi^2$ - and z-tests. Length of hospital stay over the time  
5 2 period and in relation to background characteristics was compared using a non-parametric  
6 3 Kruskal-Wallis test. Possible associations between complications and background  
7 4 characteristics were analyzed using a multivariate logistic regression. All tests were two-  
8 5 sided and p-values <0.05 were considered statistically significant. Data analyses were  
9 6 performed using SPSS version 25.0 (IBM, Armonk, NY, USA) and STATA version MP15.  
10 7  
11 8

## 9 RESULTS

10 A total of 67,855 discharges for 57,081 individual patients were identified. A total of 56,764  
11 (83.7%) discharges were for simple surgical procedures and 11,091 (16.3%) discharges were  
12 for complex surgical procedures. Most of the complex surgical procedures were fusion  
13 surgeries (94.0%). Further, 48,495 individual patients (71.5%) had only one discharge due to  
14 spinal surgery. The mean age of the patients was 52.3 (SD 15.9), and 51.4% were men.  
15 Background characteristics of all included discharges are presented in Table 1.

16 The median length of hospital stay for all patients undergoing spinal surgery  
17 decreased from 7.1 [Inter quartil range (IQR) 6.0] days in 1999 to 3.8 [IQR 4.1] in 2013 (Table  
18 1). For those undergoing a complex procedure the median length was nearly double that of  
19 those who underwent a simple procedure [8.2 (IQR 4.3) days versus 4.3 (IQR 5.7)]. In the  
20 simple surgery group, the length of hospital stay was reduced from a median of 6.2 [IQR 5.0]  
21 days in 1999 to 3.1 [IQR 3.1] in 2013, and in the complex surgery group there was a  
22 reduction from a median of 11.0 [IQR 6.1] in 1999 to 7.0 [IQR 4.0] in 2013.

### 24 Insert Table 1 here

25 The annual surgical rate including both simple and complex procedures increased  
26 from 77.8 [95%CI (75.2-80.4)] per 100,000 in 1999 to 119.9 [95%CI (107.0-112.8)] in 2013  
27 (Fig1). The rate of simple procedures increased by 138% (from 64.3 to 88.9 per 100,000  
28 inhabitants for 1999 and 2013, respectively), and the rate of complex procedures increased  
29 by 154% (from 13.6 to 21.0 per 100,000). During the 15-year study period, significantly more  
30

1  
2  
3 1 males underwent simple surgical procedures, whereas more females underwent complex  
4  
5 2 surgical procedures (Fig2).  
6  
7

8 3 **Insert Fig1 and Fig2 here**  
9

10  
11 4 Most surgeries were performed on patients aged 40–59 (Fig3). A substantial shift  
12  
13 5 towards operations performed on the older age groups is apparent for both simple and  
14  
15 6 complex surgery. Among those aged 75 years and above, the rate of simple surgery  
16  
17 7 increased by more than a factor of five by 2013, reaching 167.8 [154.3-181.3]. A similar shift  
18  
19 8 was also apparent for the complex procedures. In 1999 only 7.8 [30.3-42.9] operated  
20  
21 9 patients per 100,000 inhabitants were in the oldest age group, whereas in 2013 this rate had  
22  
23 10 increased to 36.6 [30.3-42.9]. In the younger age groups, the complex surgery rate remained  
24  
25 11 stable over the 15-year period.  
26

27 12 **Insert Fig3 here**  
28

29 13 The occurrence of complications was generally low. During the 15-year period a total  
30  
31 14 of 977 [1.4%, 95% (CI 1.38 – 1.56)] discharges were coded with diagnoses or procedures  
32  
33 15 indicating complications. Of these, 42% occurred during the index stay and 68% underwent  
34  
35 16 reoperation within 30 days. During the 15-year period, there was an increase in reoperations  
36  
37 17 within 30 days, leading to a large increase in the complication rate, from 0.7% in 1999 to  
38  
39 18 2.4% in 2013. The multivariate analysis showed that complications were significantly  
40  
41 19 associated with younger and middle-aged groups, receiving complex surgery, and having an  
42  
43 20 extended hospital stay (Table 2). There was no statistically significant interaction between  
44  
45 21 type of surgery (simple vs complex) and length of hospital stay ( $p=0.296$ ), or between age  
46  
47 22 groups and type of surgery ( $p=0.678$ ).

48  
49 23 A total of 10,015 [14.8%, 95% CI (14.5 – 15.0)] discharges were reoperations; 517  
50  
51 24 [0.8%, 95%CI (0.8 – 0.9)] occurred between 30 and 90 days after the index discharge, 2611  
52  
53 25 [3.8%, 95%CI (3.7 – 4.0)] between 91 days and 12 months, and 2429 [3.6%, 95%CI (3.5 – 3.7)]  
54  
55 26 between the first and second year. There was a large decrease in the proportion of patients  
56  
57 27 who received reoperations during the 15-year period: from 21.6% in 1999 to 2.3% in 2013.

58 28 **Insert Table 2 here**  
59  
60 29

## 1 DISCUSSION

2 This national study identified a significant increase in lumbar spine surgery in Norway from  
3 1999 to 2013. This increase was most marked in the use of simple surgical procedures like  
4 microsurgical discectomy and/or decompression surgery, in particular among elderly  
5 patients above 75 years of age. The increase in complex surgery, for the most part fusion  
6 surgery, was also most prevalent in the oldest age group.

7 The main strength of the current study is that it covers all spinal surgery procedures  
8 carried out in public hospitals in Norway during a 15-year period, except for surgery due to  
9 red flag diagnoses (cancer, spinal infections, inflammatory diseases, etc) or trauma. A  
10 potential weakness is the risk of misclassification of diagnoses or procedures [18]. The lack  
11 of accuracy of diagnosis in such registries has been reported and a systematic review on this  
12 field has showed that procedure coding might be more accurate than coding based upon  
13 diagnosis [19]. In order to reduce misclassification in the current study, we used the surgical  
14 procedure coding in combination with diagnoses when classifying the types of surgery  
15 provided. Further, we argue that the risk of misclassification is minor in this study as we  
16 assessed two large and different types of spinal surgery (simple versus complex spinal  
17 surgery procedures). As expected, the two groups differ with respect to length of hospital  
18 stay, complications, and reoperations. We considered classifying spinal surgery into simple  
19 and complex procedures useful when reporting trends in spinal surgery within a large and  
20 heterogeneous dataset such as hospital administrative data used in this study. Finally, the  
21 present material did not include surgery conducted in private clinics/hospitals. Private for-  
22 profit hospitals in Norway perform currently approximately 7% of the total number of  
23 elective surgical procedures [13], usually as day surgeries. This might have contributed to the  
24 increase in complications in public hospitals after private surgery became common in 2007.  
25 Private surgery would leave the public hospitals to deal with the more complex cases and  
26 procedures during this portion of the study period (2007–2013). A previous study comparing  
27 surgery due to disc herniation in public and private hospitals in Norway, showed that  
28 patients operated by simple procedures due to lumbar disc herniation in public hospitals  
29 were older, and had more comorbidity and other risk factors associated with unfavorable  
30 outcomes compared to those operated in the private clinics [20].



1  
2  
3 1 There are very few published papers that provide an overview of *all* types of spinal  
4 2 surgery for lumbar degenerative disorders over an extended time period. Davis [21]  
5 3 reported that hospitalization rates for all types of lumbar surgery (including fusion and  
6 4 decompression) increased markedly in the USA from 1979 to 1990 . In line with Davis, our  
7 5 results demonstrate that more men than women received lumbar spine surgery. Several  
8 6 studies on the rates of different types of spinal surgery, such as disc herniation and spinal  
9 7 fusion surgery, have been published [2-11, 22]. In general, the findings in the present paper  
10 8 are in accordance with the other studies from Scandinavian countries [3, 5] and Germany  
11 9 [6], which show increased rates for lumbar disc herniation and spinal stenosis surgery. The  
12 10 increase reported in most of the western-European countries is not as large as that found in  
13 11 the United States [2, 4, 7, 9, 11] and United Kingdom [10]. Furthermore, these results also fit  
14 12 with the overall national healthcare expenditure across countries; in Norway it is 10.4% of  
15 13 the GDP, which is similar to other western-European countries such as Germany and  
16 14 Sweden, as compared to 17.1% in the United States [23].

15 15 The increase in public lumbar spine surgery in Norway is difficult to understand,  
16 16 because only minor increases in the incidence and severity of low back pain have been  
17 17 reported in the Norwegian population [24]. However, parts of the increase may be explained  
18 18 by the growing number of elderly patients and the increase of hospital surgeons in general  
19 19 [25]. In addition, there has been a substantial rise in the use of radiographic examinations  
20 20 such as MRI, which might have led to more surgery [26]. The large variations in spinal  
21 21 surgery rates may also be explained by a lack of uniform and consensus-based criteria for  
22 22 surgery, financial incentives for surgical interventions, and new technology [7-10, 27]. There  
23 23 is a large need for high-quality scientific evidence as well as clinical consensus regarding an  
24 24 optimal use of resource-demanding investigations and treatments connected to spinal  
25 25 disorders. Many of the new technologies and more complex procedures have questionable  
26 26 clinical or cost-benefit efficacy. Furthermore, we need stronger scientific evidence with  
27 27 respect to the selection of patients to surgical treatment. Both in a clinical and societal  
28 28 perspective, non-surgical management might be an appropriate option for patients who  
29 29 wish to defer or avoid surgery [28]. The mean complication rate during the study period was  
30 30 low, but it increased to 2.4% at the end of the period. This increase may be explained by the  
31 31 increase in reoperations within 30 days at the end of the 15-year period. Hence, there seems  
32 32 to be a trend towards a shorter timeframe for reoperations by the end of this 15-year time



1  
2  
3 1 period, a trend which is also reported in the Swedish study of lumbar disc herniation surgery  
4  
5 2 between 1987 and 1999 [3]. Our finding that older patients were less likely to experience  
6  
7 3 complications and receive reoperations compared with the younger and middle-aged groups  
8  
9 4 is hard to explain. It may be that surgeons are more hesitant to re-operate older people, and  
10  
11 5 are more selective with respect to other potential risk factors for complications after  
12  
13 6 surgery.

## 14 15 7 **CONCLUSION**

16  
17 8 There was a substantial increase in spinal surgery in Norway from 1999 to 2013. The rise in  
18  
19 9 number of surgeries, in particular among elderly people, represents a significant workload  
20  
21 10 for hospitals in Norway, and a challenge to the public healthcare system in terms of meeting  
22  
23 11 the increased burden associated with low back pain in an aging population.

### 24 25 12 **Author of affiliations:**

26  
27  
28 13 <sup>1</sup> Research and Communication Unit for Musculoskeletal Health, Oslo University Hospital, Oslo,  
29  
30 14 Norway

31  
32 15 <sup>2</sup> Faculty of Health Science, OsloMet – Oslo Metropolitan University, Oslo, Norway

33  
34 16 <sup>3</sup> Department of Neurology, Oslo University Hospital, Oslo, Norway

35  
36 17 <sup>4</sup> Institute of Clinical Medicine, Faculty of Medicine, University of Oslo, Norway

37  
38 18 <sup>5</sup> Department of Rheumatology, Østfold Hospital Trust, Grålum, Norway

39  
40 19 <sup>6</sup> Division for Health Services, Norwegian Institute of Public Health, Oslo, Norway

41  
42 20 <sup>7</sup> Norwegian Registry for Spine Surgery (NORspine), University Hospital of Northern Norway, Tromsø,  
43  
44 21 Norway

45  
46 22 <sup>8</sup> Department of Neurosurgery, University Hospital of Northern Norway, Tromsø, Norway

47  
48 23 <sup>9</sup> Institute of Clinical Medicine, The Arctic University (UiT) of Norway, Tromsø, Norway

49  
50 24 <sup>10</sup> Division of Clinical Neuroscience, Oslo University Hospital, Oslo, Norway

51  
52 25  
53 26 **CORRESPONDING AUTHOR'S EMAIL ADDRESS:** [mgrotle@oslomet.no](mailto:mgrotle@oslomet.no)

54  
55 27 **Contributors;** MG, JH and JAZ designed the study. MG and MCS analysed the data, and JAZ, OF, LG,  
56  
57 28 KS, and TKS contributed in discussion of analyses and results presentation. MG wrote the manuscript  
58  
59 29 with all authors contributing in reading, commenting and approving the final manuscript.  
60

1 **The original protocol for the study** can be delivered upon request to the corresponding author.

2 **Funding statement:** This work was supported by the South-Eastern Norway Regional Health  
3 Authority, grant number 2013030.

4 **Competing interests:** There are no competing interests to be reported in this study.

5 **Any checklist and flow diagram for the appropriate reporting statement:** not relevant

6 **Patient consent:** not required

7 **Ethics approval:** The study was approved by the Norwegian Data Inspectorate (2014/14413) and the  
8 Norwegian Regional Ethics Committee (2013/1662, REC south-east D).

9 **Data sharing statement:** It is not possible to participate in data sharing due to ethical reasons and  
10 strict data protection regulation in Norway.

#### 11 **Figure legends:**

12 Fig 1. Annual surgery rates per 100,000 population of simple and complex lumbar surgical procedures  
13 in Norway from 1999 to 2013.

14 Fig 2. Annual incidence per 100,000 population of simple and complex lumbar surgery in Norway  
15 from 1999 to 2013, according to gender.

16 Fig 3. Annual incidence per 100,000 inhabitants of simple (upper figure) and complex (lower figure)  
17 surgery in Norway from 1999 to 2013, according to age groups.

#### 18 **REFERENCES**

- 19 1. Global Burden of Disease, Injury Incidence, Prevalence Collaborators. Global, regional, and  
20 national incidence, prevalence, and years lived with disability for 310 diseases and injuries,  
21 1990–2015: a systematic analysis for the Global Burden of Disease Study 2015. *Lancet* 2016;  
22 **388**: 1545–602.
- 23 2. Martin BI, Mirza SK, Spina N, Spiker WR, Lawrence B, Brodke DS. Trends in Lumbar Fusion  
24 Procedure Rates and Associated Hospital Costs for Degenerative Spinal Diseases in the  
25 United States, 2004 to 2015. *Spine (Phila Pa 1976)*. 2019 Mar 1;44(5):369-376.

## Trends in lumbar spine surgery

3. Jansson KA, Nemeth G, Granath F, Blomqvist P. Surgery for herniation of a lumbar disc in Sweden between 1987 and 1999. An analysis of 27,576 operations. *J Bone Joint Surg Br* 2004 Aug;86(6):841-7.
4. Rajae SS, Bae HW, Kanim LE, Delamarter RB. Spinal fusion in the United States: analysis of trends from 1998 to 2008. *Spine (Phila Pa 1976)* 2012 Jan 1;37(1):67-76.
5. Rasmussen S, Jensen CM, Iversen MG, Kehlet H. [Lumbar fusion surgery for degenerative conditions in Denmark 2005-2006]. *Ugeskr Laeger* 2009 Sep 21;171(39):2804-7.
6. Steiger HJ, Kramer M, Reulen HJ. Development of neurosurgery in Germany: comparison of data collected by polls for 1997, 2003, and 2008 among providers of neurosurgical care. *World Neurosurg* 2012 Jan;77(1):18-27.
7. Weinstein JN, Lurie JD, Olson PR, Bronner KK, Fisher ES. United States' trends and regional variations in lumbar spine surgery: 1992-2003. *Spine (Phila Pa 1976)* 2006 Nov 1;31(23):2707-14.
8. Kim P, Kurokawa R, Itoki K. Technical advancements and utilization of spine surgery – international disparities in trend-dynamics between Japan, Korea and the USA. *Neurol Med Chir (Tokyo)* 2010;50:853-8.
9. Yoshihara H and Yoneoka D. National trends in the surgical treatment for lumbar degenerative disc disease: United States, 2000 to 2009. *Spine J* 2015;15(2):265-71.
10. Sivasubramaniam V, Patel HC, Ozdemir BA. Trends in hospital admissions and surgical procedures for degenerative lumbar spine disease in England: a 15-year time-series study. *BMJ Open*, 2015. 5(12): p. e009011.
11. Cherkin DC, Deyo RA, Loeser JD, Bush T, Waddell G. An international comparison of back surgery rates. *Spine (Phila Pa 1976)* 1994 Jun 1;19(11):1201-6.
12. Statistics Norway. Available <https://www.ssb.no/en/statbank>
13. Pedersen, M., Kalseth, B., Lilleeng, S.E., Mehus, K.H., Pedersen, P.B., Sitter, M., *Private aktører i spesialisthelsetjenesten. Omfang og utvikling 2010-2014*. Norwegian Directorate of Health 2016. Available at: <https://helsedirektoratet.no/Lists/Publikasjoner/Attachments/1159/Private%20akt%C3%B8rer%20i%20spesialisthelsetjenesten.%20Omfang%20og%20utvikling%202010-2014.%20IS-2450.pdf>.
14. Hassani S et al. *30-Day Survival Probabilities as a Quality Indicator for Norwegian Hospitals: Data Management and Analysis*. *PloS one*, 2015. 10(9): p. e0136547
15. *Nordic Centre for Classifications in Health Care. NOMESCO Classification of Surgical Procedures (NCSP)* . Available at: [http://www.nordclass.se/ncsp\\_e.htm](http://www.nordclass.se/ncsp_e.htm).

- 1  
2  
3 1 16. Solberg, T. *NORspine Annual report 2013*. Available at:  
4 2 <https://www.kvalitetsregistre.no/sites/default/files/http->  
5 3 [/www.kvalitetsregistre.no/getfile.php/Norsk/Bilder/Offentliggj-C3-B8ring-2014/-C3-](https://www.kvalitetsregistre.no/getfile.php/Norsk/Bilder/Offentliggj-C3-B8ring-2014/-C3-)  
6 4 [rsrapport\\_NKR\\_2013--2-.pdf](https://www.kvalitetsregistre.no/getfile.php/Norsk/Bilder/Offentliggj-C3-B8ring-2014/-C3-rsrapport_NKR_2013--2-.pdf).  
7 5  
8 6  
9 7  
10 8  
11 9  
12 10 17. [https://www.helsedirektoratet.no/tema/statistikk-registre-og-rapporter/helsedata-og-helseregistre/norsk-pasientregister-npr/innhold-og-kvalitet-i-npr/\\_attachment/download/e2e96893-e676-4a56-be07-7a37589c4e83:d4503aa7adeb89ec661a9a44ee12b44cb9167add/17-9624-2%20Dekningsgrad\\_rapport\\_NKR\\_2015-16.pdf](https://www.helsedirektoratet.no/tema/statistikk-registre-og-rapporter/helsedata-og-helseregistre/norsk-pasientregister-npr/innhold-og-kvalitet-i-npr/_attachment/download/e2e96893-e676-4a56-be07-7a37589c4e83:d4503aa7adeb89ec661a9a44ee12b44cb9167add/17-9624-2%20Dekningsgrad_rapport_NKR_2015-16.pdf)  
13 11  
14 12  
15 13  
16 14  
17 15  
18 16  
19 17 18. Gavrielov-Yusim, N. and M. Friger, *Use of administrative medical databases in population-based research*. J Epidemiol Community Health, 2014. 68(3): p. 283-7.  
20 18  
21 19  
22 19. Burns, E.M., et al., *Systematic review of discharge coding accuracy*. J Public Health (Oxf), 2012. 34(1): p. 138-48.  
23 20  
24 21  
25 22 20. Grotle M, Solberg T, Storheim K, Laerum E, Zwart JA. Public and private health service in Norway: a comparison of patient characteristics and surgery criteria for patients with nerve root affections due to discus herniation. Eur Spine J. 2014;23(9):1984-91. PMID: 24898309  
26 23  
27 24  
28 25  
29 26  
30 27 21. Davis H. Increasing Rates of Cervical and Lumbar Spine Surgery in the United States, 1979 – 1990. Spine 1994;19:1117-1124  
31 28  
32 29  
33 30 22. Grøvlø L, Fjeld OR, Haugen AJ, Helgeland J, Småstuen MC, Solberg TK, Zwart JA, Grotle M. The Rates of LSS Surgery in Norwegian Public Hospitals: A Threefold Increase From 1999 to 2013. Spine (Phila Pa 1976). 2019 Mar 15;44(6):E372-E378. doi: 10.1097/BRS.0000000000002858.  
34 31  
35 32  
36 33  
37 34  
38 35  
39 36  
40 37 23. <https://data.oecd.org/healthres/health-spending.htm>  
41 38  
42 39 24. Kinge JM, Knudsen AK, Skirbekk V, Vollset SE. Musculoskeletal disorders in Norway: prevalence of chronicity and use of primary and specialist health care services. BMC musculoskeletal disorders 2015;16:75.  
43 40  
44 41  
45 42  
46 43 25. Welle-Watne, C., et al., *Utviklingen for leger og legestillinger i primær- og spesialisthelsetjenesten – Rapport 2014*. Norwegian Directorate of Health 2014. Available at: <https://helsedirektoratet.no/Lists/Publikasjoner/Attachments/957/Utviklingen-for-leger-og-legestillinger-i-prim%C3%A6r-og-spesialisthelsetjenesten-2014-IS-2252.pdf> .  
47 44  
48 45  
49 46  
50 47  
51 48  
52 49  
53 50 26. Borretzen, I., K.B. Lysdahl, and H.M. Olerud, *Diagnostic radiology in Norway trends in examination frequency and collective effective dose*. Radiat Prot Dosimetry, 2007. 124(4): p. 339-47.  
54 51  
55 52  
56 53  
57 54  
58 55  
59 56  
60 57

- 1  
2  
3 1 27. Chou R, Baisden J, Carragee EJ, Resnick DK, Shaffer WO, Loeser JD. Surgery for low back pain:  
4 2 a review of the evidence for an American Pain Society clinical practice guideline. *Spine* 2009;  
5 3 **34**: 1094–109.  
6  
7  
8 4 28. Nadine E Foster, Johannes R Anema, Dan Cherkin, Roger Chou, Steven P Cohen, Douglas P  
9 5 Gross, Paulo H Ferreira, Julie M Fritz, Bart W Koes, Wilco Peul, Judith A Turner, Chris G Maher  
10 6 on behalf of the Lancet Low Back Pain Series Working Group *Lancet*. Prevention and  
11 7 treatment of low back pain: evidence, challenges, and promising directions. *The Lancet*, Vol.  
12 8 391, No. 10137.  
13  
14  
15  
16  
17  
18  
19  
20  
21  
22  
23  
24  
25  
26  
27  
28  
29  
30  
31  
32  
33  
34  
35  
36  
37  
38  
39  
40  
41  
42  
43  
44  
45  
46  
47  
48  
49  
50  
51  
52  
53  
54  
55  
56  
57  
58  
59  
60

For peer review only

**Table 1.** Characteristics of 67,855 lumbar spine operations in 57,081 patients in Norway, 1999 to 2013

|                   | No. of operations (%) | Length of stay, days, median [range, IQR] |
|-------------------|-----------------------|-------------------------------------------|
| Age (years)       |                       |                                           |
| 18-39             | 16396 (24.2)          | 4.2 [724, 4.4]                            |
| 40-59             | 28237 (41.7)          | 6.3 [618, 4.7]                            |
| 60-75             | 16160 (23.9)          | 5.9 [250, 5.8]                            |
| > 75              | 6910 (10.2)           | 7.2 [226, 6.7]                            |
| Missing           | 152                   |                                           |
| Gender            |                       |                                           |
| Male              | 34902 (51.4)          | 4.7 [239, 4.4]                            |
| Female            | 32801 (48.3)          | 6.0 [724, 5.8]                            |
| Missing           | 152                   |                                           |
| Year of operation |                       |                                           |
| 1999              | 3460 (5.1)            | 7.1 [149.9, 6.0]                          |
| 2000              | 3996 (5.9)            | 7.0 [420, 6.0]                            |
| 2001              | 4200 (6.2)            | 7.0 [138, 6.0]                            |
| 2002              | 3865 (5.7)            | 6.2 [202, 6.0]                            |
| 2003              | 4557 (6.7)            | 6.1 [238, 5.4]                            |
| 2004              | 4396 (6.5)            | 6.1 [250, 5.8]                            |
| 2005              | 4572 (6.7)            | 6.0 [724, 5.3]                            |
| 2006              | 4422 (6.5)            | 5.8 [138, 5.5]                            |
| 2007              | 4255 (6.3)            | 5.1 [618, 5.0]                            |
| 2008              | 4164 (6.1)            | 4.9 [179, 4.3]                            |

## Trends in lumbar spine surgery

|                   |              |                |
|-------------------|--------------|----------------|
| 2009              | 4449 (6.6)   | 4.2 [142, 4.9] |
| 2010              | 5130 (7.6)   | 4.1 [183, 4.8] |
| 2011              | 5241 (7.7)   | 4.0 [210, 4.2] |
| 2012              | 5597 (8.2)   | 4.1 [165, 4.2] |
| 2013              | 5551 (8.2)   | 3.8 [219, 4.1] |
| Missing           | 0            | 0              |
| Type of surgery   |              |                |
| Simple            | 56764 (83.7) | 4.3 [724, 4.3] |
| Complex           | 11091 (16.3) | 8.2 [420, 5.7] |
| No. of operations |              |                |
| One               | 57029 (84.0) | 5.1 [724, 5.0] |
| Two               | 8623 (12.7)  | 5.2 [618, 5.1] |
| Three             | 1602 (2.4)   | 6.2 [205, 6.0] |
| ≥ Four            | 467 (0.7)    | 6.9 [115, 4.4] |
| Missing           | 134          | 134            |

1  
2  
3

**Table 2.** Multivariate logistic regression model of factors associated with complications (including reoperation within 30 days) due to lumbar spine surgery in Norway from 1999 to 2013 (N=67,855)

|                          | Complications<br>(n=977) | OR   | Lower 95%<br>CI | Upper 95%<br>CI |
|--------------------------|--------------------------|------|-----------------|-----------------|
| Age (years)              |                          |      |                 |                 |
| 18-39                    | 250                      | Ref  |                 |                 |
| 40-59                    | 460                      | 0.97 | 0.83            | 1.13            |
| 60-75                    | 198                      | 0.61 | 0.50            | 0.74            |
| > 75                     | 69                       | 0.51 | 0.39            | 0.67            |
| Missing                  | 152                      |      |                 |                 |
| Gender                   |                          |      |                 |                 |
| Male                     | 510                      | Ref  |                 |                 |
| Female                   | 467                      | 0.90 | 0.79            | 1.02            |
| Missing                  | 152                      |      |                 |                 |
| Length of stay<br>(days) |                          | 1.02 | 1.01            | 1.02            |
| Type of surgery          |                          |      |                 |                 |
| Simple                   | 659                      | Ref  |                 |                 |
| Complex                  | 318                      | 2.34 | 2.04            | 2.69            |
| Year of operation        |                          |      |                 |                 |
| 1999                     | 24                       | Ref  |                 |                 |
| 2000                     | 29                       | 0.98 | 0.57            | 1.71            |
| 2001                     | 29                       | 1.03 | 0.60            | 1.77            |
| 2002                     | 33                       | 1.31 | 0.77            | 2.22            |



## Trends in lumbar spine surgery

|         |     |      |      |      |
|---------|-----|------|------|------|
| 2003    | 44  | 1.52 | 0.92 | 2.50 |
| 2004    | 41  | 1.46 | 0.88 | 2.43 |
| 2005    | 67  | 2.23 | 1.39 | 3.57 |
| 2006    | 60  | 2.25 | 1.40 | 3.63 |
| 2007    | 58  | 2.25 | 1.39 | 3.64 |
| 2008    | 56  | 2.29 | 1.42 | 3.71 |
| 2009    | 80  | 3.12 | 1.97 | 4.94 |
| 2010    | 89  | 3.03 | 1.93 | 4.78 |
| 2011    | 93  | 3.03 | 1.93 | 4.77 |
| 2012    | 140 | 4.31 | 2.79 | 4.67 |
| 2013    | 134 | 4.16 | 2.68 | 6.44 |
| Missing | 134 |      |      |      |

1

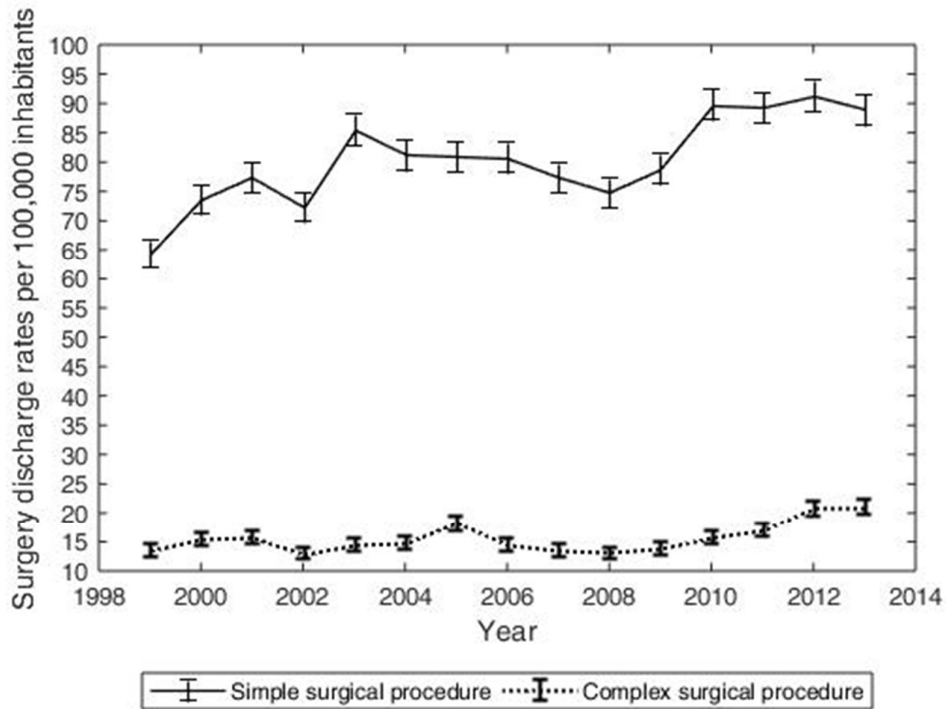

Fig 1. Annual surgery rates per 100,000 population of simple and complex lumbar surgical procedures in Norway from 1999 to 2013.

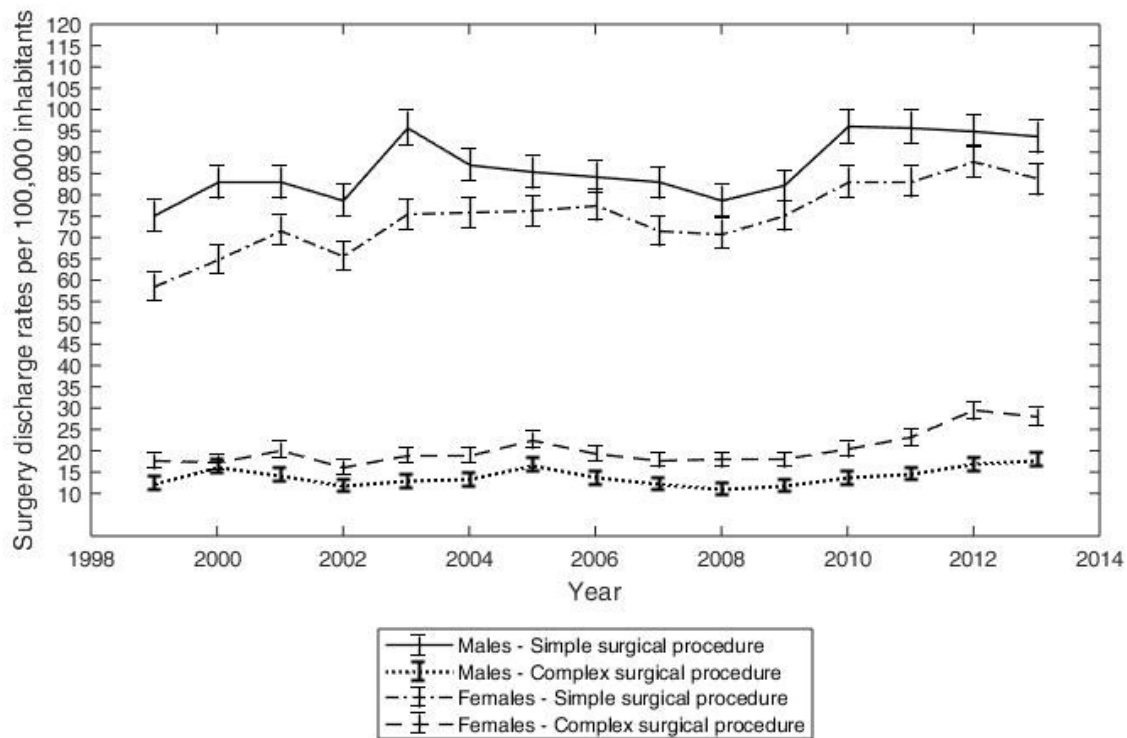

Fig 2. Annual incidence per 100,000 population of simple and complex lumbar surgery in Norway from 1999 to 2013, according to gender.

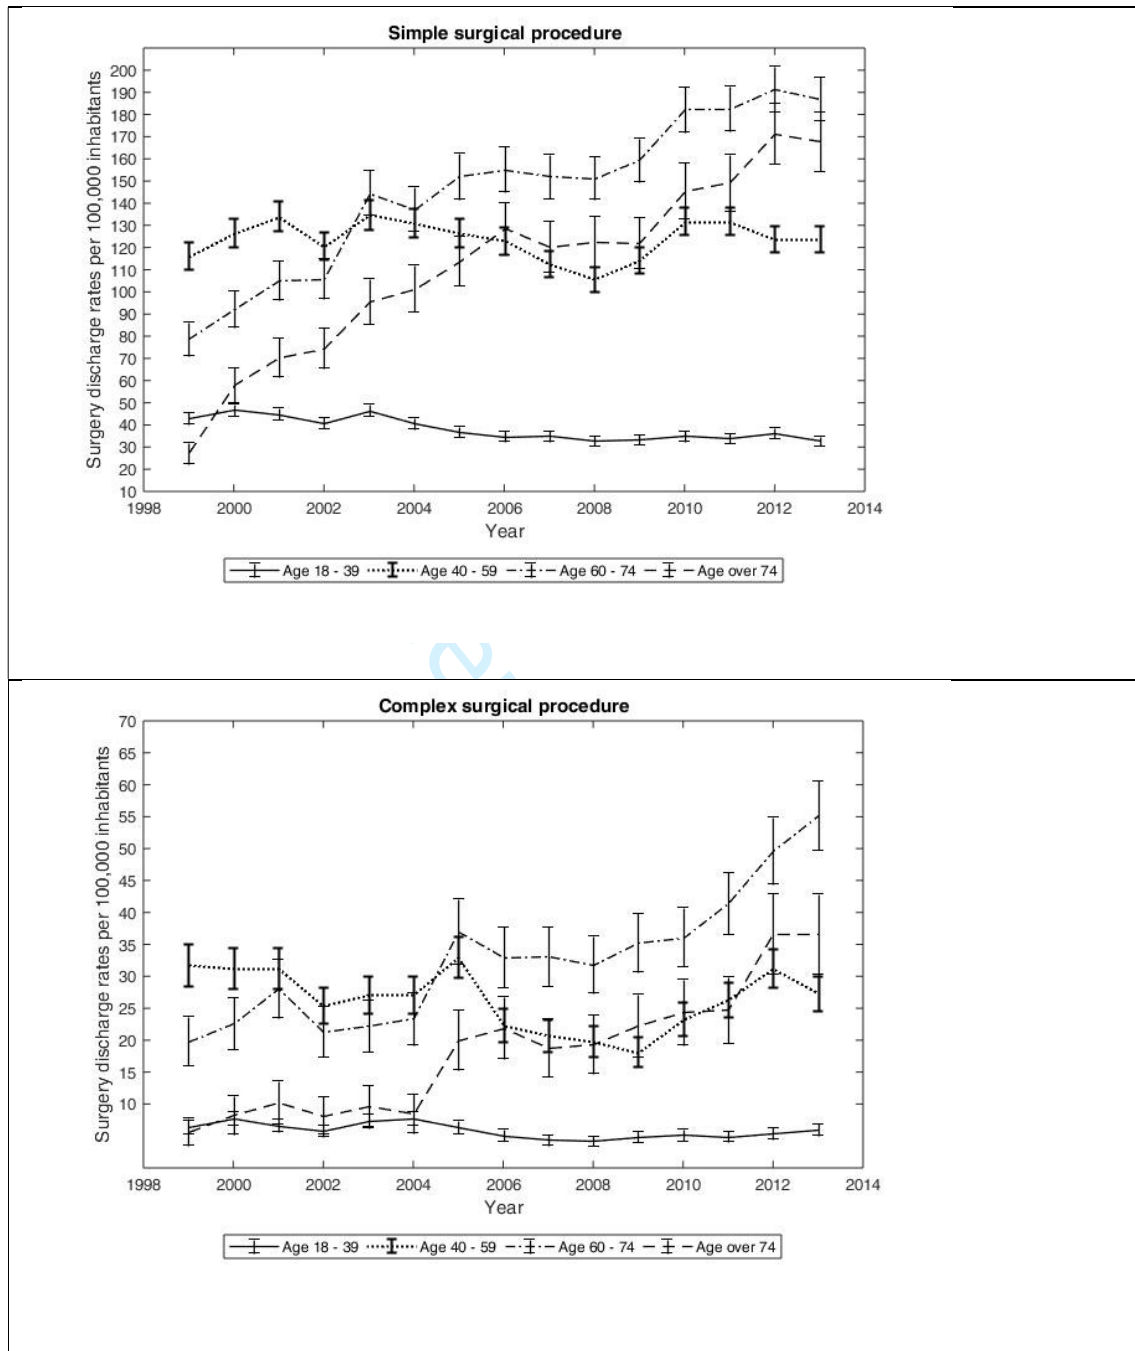

Fig 3. Annual incidence per 100,000 inhabitants of simple (upper figure) and complex (lower figure) surgery in Norway from 1999 to 2013, according to age groups.

STROBE Statement—Checklist of items that should be included in reports of *cohort studies*

|                              | Item No | Recommendation                                                                                                                                                                                                                                                                                                                                                                                                |                                                                         |
|------------------------------|---------|---------------------------------------------------------------------------------------------------------------------------------------------------------------------------------------------------------------------------------------------------------------------------------------------------------------------------------------------------------------------------------------------------------------|-------------------------------------------------------------------------|
| <b>Title and abstract</b>    | 1       | (a) Indicate the study's design with a commonly used term in the title or the abstract<br>(b) Provide in the abstract an informative and balanced summary of what was done and what was found                                                                                                                                                                                                                 | title<br>abstract                                                       |
| <b>Introduction</b>          |         |                                                                                                                                                                                                                                                                                                                                                                                                               |                                                                         |
| Background/rationale         | 2       | Explain the scientific background and rationale for the investigation being reported                                                                                                                                                                                                                                                                                                                          | Introductions<br>p. 3                                                   |
| Objectives                   | 3       | State specific objectives, including any prespecified hypotheses                                                                                                                                                                                                                                                                                                                                              | "                                                                       |
| <b>Methods</b>               |         |                                                                                                                                                                                                                                                                                                                                                                                                               |                                                                         |
| Study design                 | 4       | Present key elements of study design early in the paper                                                                                                                                                                                                                                                                                                                                                       | p. 4                                                                    |
| Setting                      | 5       | Describe the setting, locations, and relevant dates, including periods of recruitment, exposure, follow-up, and data collection                                                                                                                                                                                                                                                                               | p. 4-5                                                                  |
| Participants                 | 6       | (a) Give the eligibility criteria, and the sources and methods of selection of participants. Describe methods of follow-up<br>(b) For matched studies, give matching criteria and number of exposed and unexposed                                                                                                                                                                                             | p. 4<br>p. 610-22<br>+ p. 51.1-4                                        |
| Variables                    | 7       | Clearly define all outcomes, exposures, predictors, potential confounders, and effect modifiers. Give diagnostic criteria, if applicable                                                                                                                                                                                                                                                                      | p. 51.5-24                                                              |
| Data sources/<br>measurement | 8*      | For each variable of interest, give sources of data and details of methods of assessment (measurement). Describe comparability of assessment methods if there is more than one group                                                                                                                                                                                                                          | p. 46.10-22<br>+<br>p. 51.5-24                                          |
| Bias                         | 9       | Describe any efforts to address potential sources of bias                                                                                                                                                                                                                                                                                                                                                     | p. 61.1-10                                                              |
| Study size                   | 10      | Explain how the study size was arrived at                                                                                                                                                                                                                                                                                                                                                                     | not relevant, all cases included                                        |
| Quantitative variables       | 11      | Explain how quantitative variables were handled in the analyses. If applicable, describe which groupings were chosen and why                                                                                                                                                                                                                                                                                  | p. 61.1-10                                                              |
| Statistical methods          | 12      | (a) Describe all statistical methods, including those used to control for confounding<br>(b) Describe any methods used to examine subgroups and interactions<br>(c) Explain how missing data were addressed<br>(d) If applicable, explain how loss to follow-up was addressed<br>(e) Describe any sensitivity analyses                                                                                        | "                                                                       |
| <b>Results</b>               |         |                                                                                                                                                                                                                                                                                                                                                                                                               |                                                                         |
| Participants                 | 13*     | (a) Report numbers of individuals at each stage of study—eg numbers potentially eligible, examined for eligibility, confirmed eligible, included in the study, completing follow-up, and analysed<br>(b) Give reasons for non-participation at each stage<br>(c) Consider use of a flow diagram                                                                                                               | p. 61.12-15<br>not relevant<br>"                                        |
| Descriptive data             | 14*     | (a) Give characteristics of study participants (eg demographic, clinical, social) and information on exposures and potential confounders<br>(b) Indicate number of participants with missing data for each variable of interest<br>(c) Summarise follow-up time (eg, average and total amount)                                                                                                                | p. 61.12-17<br>+ Table 1<br>not relevant<br>p. 6 + Table 1<br>+ Fig 1+2 |
| Outcome data                 | 15*     | Report numbers of outcome events or summary measures over time                                                                                                                                                                                                                                                                                                                                                |                                                                         |
| Main results                 | 16      | (a) Give unadjusted estimates and, if applicable, confounder-adjusted estimates and their precision (eg, 95% confidence interval). Make clear which confounders were adjusted for and why they were included<br>(b) Report category boundaries when continuous variables were categorized<br>(c) If relevant, consider translating estimates of relative risk into absolute risk for a meaningful time period | p. 71.13-26<br>+ Table 2<br>not relevant                                |

1  
2  
3  
4  
5  
6  
7  
8  
9  
10  
11  
12  
13  
14  
15  
16  
17  
18  
19  
20  
21  
22  
23  
24  
25  
26  
27  
28  
29  
30  
31  
32  
33  
34  
35  
36  
37  
38  
39  
40  
41  
42  
43  
44  
45  
46  
47  
48  
49  
50  
51  
52  
53  
54  
55  
56  
57  
58  
59  
60

|                          |    |                                                                                                                                                                            |        |
|--------------------------|----|----------------------------------------------------------------------------------------------------------------------------------------------------------------------------|--------|
| Other analyses           | 17 | Report other analyses done—eg analyses of subgroups and interactions, and sensitivity analyses                                                                             |        |
| <b>Discussion</b>        |    |                                                                                                                                                                            |        |
| Key results              | 18 | Summarise key results with reference to study objectives                                                                                                                   | p. 8   |
| Limitations              | 19 | Discuss limitations of the study, taking into account sources of potential bias or imprecision. Discuss both direction and magnitude of any potential bias                 | p. 8   |
| Interpretation           | 20 | Give a cautious overall interpretation of results considering objectives, limitations, multiplicity of analyses, results from similar studies, and other relevant evidence | p. 8-9 |
| Generalisability         | 21 | Discuss the generalisability (external validity) of the study results                                                                                                      | p. 8   |
| <b>Other information</b> |    |                                                                                                                                                                            |        |
| Funding                  | 22 | Give the source of funding and the role of the funders for the present study and, if applicable, for the original study on which the present article is based              | p. 10  |

\*Give information separately for exposed and unexposed groups.

**Note:** An Explanation and Elaboration article discusses each checklist item and gives methodological background and published examples of transparent reporting. The STROBE checklist is best used in conjunction with this article (freely available on the Web sites of PLoS Medicine at <http://www.plosmedicine.org/>, Annals of Internal Medicine at <http://www.annals.org/>, and Epidemiology at <http://www.epidem.com/>). Information on the STROBE Initiative is available at <http://www.strobe-statement.org>.
